# Supplementary material for: A rapidly changing jet orientation in the stellar-mass black-hole system V404 Cygni
Source: Springer Nature journal article supplement (doi:10.1038/s41586-019-1152-0), 2019-04-29
Supplement: MOESM2 [file 41586_2019_1152_MOESM2_ESM.xlsx]

## Sheet: figure1_xray
MJD-57190	3-10keV count rate	Error on 3-10keV count rate	Band
0.93748	0	3.6435	3-10keV
0.93758	3.8062	5.8343	3-10keV
0.93767	8.347	10.6061	3-10keV
0.93776	-1.7548	7.7277	3-10keV
0.93785	11.0921	11.4317	3-10keV
0.93795	10.0025	10.5415	3-10keV
0.93804	-5.2577	6.4967	3-10keV
0.93813	-8.1597	4.9602	3-10keV
0.93822	1.1477	8.8048	3-10keV
0.93832	-8.9497	6.6805	3-10keV
0.93841	5.8729	9.6902	3-10keV
0.9385	8.6483	11.5036	3-10keV
0.93859	-4.2167	7.8448	3-10keV
0.93869	3.6085	8.7279	3-10keV
0.93878	1.322	7.608	3-10keV
0.93887	-6.068	7.9029	3-10keV
0.93896	11.0798	11.4187	3-10keV
0.93906	5.2764	9.7332	3-10keV
0.93915	4.061	9.7914	3-10keV
0.93924	1.7621	8.782	3-10keV
0.93934	-17.2164	4.8552	3-10keV
0.93943	-4.652	6.4775	3-10keV
0.93952	-3.4193	6.4159	3-10keV
0.93961	-8.3393	6.6618	3-10keV
0.93971	-12.4687	5.2188	3-10keV
0.9398	5.283	9.7393	3-10keV
0.93989	-11.224	5.1382	3-10keV
0.93998	-0.5223	7.6722	3-10keV
0.94008	-14.2986	5.3228	3-10keV
0.94017	-12.8982	4.5727	3-10keV
0.94026	-1.3228	8.8998	3-10keV
0.94035	-7.1168	6.6028	3-10keV
0.94045	17.6808	12.0911	3-10keV
0.94054	5.8989	9.7264	3-10keV
0.94063	-8.3495	6.6592	3-10keV
0.94072	-7.9101	7.9901	3-10keV
0.94082	4.0494	9.7999	3-10keV
0.94091	6.9616	10.6626	3-10keV
0.941	-2.1929	6.3615	3-10keV
0.94109	-10.1791	6.7364	3-10keV
0.94119	-15.3965	4.7402	3-10keV
0.94128	8.3642	9.6368	3-10keV
0.94137	-5.8862	6.5574	3-10keV
0.94146	-4.2	7.8314	3-10keV
0.94156	-0.5225	7.6754	3-10keV
0.94165	0.9729	9.8626	3-10keV
0.94174	4.0443	9.7735	3-10keV
0.94184	-7.1096	6.5958	3-10keV
0.94193	11.8784	10.5142	3-10keV
0.94202	-19.6884	5.0101	3-10keV
0.94211	-5.2709	6.5174	3-10keV
0.94221	-3.4311	6.4332	3-10keV
0.9423	-2.3696	7.7571	3-10keV
0.94239	-1.1383	7.7093	3-10keV
0.94248	0.3537	9.8904	3-10keV
0.94258	19.5159	12.0336	3-10keV
0.94267	8.8179	10.6141	3-10keV
0.94276	15.3684	11.2978	3-10keV
0.94285	0.5316	8.8325	3-10keV
0.94295	15.3595	11.2862	3-10keV
0.94304	10.6591	10.55	3-10keV
0.94313	9.5811	9.599	3-10keV
0.94322	-9.5696	6.7099	3-10keV
0.94332	-10.1813	6.7378	3-10keV
0.94341	1.5858	9.8438	3-10keV
0.9435	-4.2227	7.8521	3-10keV
0.94359	6.5078	9.6994	3-10keV
0.94369	1.1461	8.8115	3-10keV
0.94378	2.5503	7.5662	3-10keV
0.94387	-7.9055	7.981	3-10keV
0.94396	14.1484	11.3285	3-10keV
0.94406	6.9408	10.6354	3-10keV
0.94415	-12.4547	5.2127	3-10keV
0.94424	4.6598	9.749	3-10keV
0.94434	-5.9083	6.5523	3-10keV
0.94443	-11.4396	6.8075	3-10keV
0.94452	4.051	9.7816	3-10keV
0.94461	-7.729	6.6275	3-10keV
0.94471	-13.087	5.2576	3-10keV
0.9448	-9.5591	6.7014	3-10keV
0.94489	-7.7081	6.6115	3-10keV
0.94498	-4.2079	7.8287	3-10keV
0.94508	2.5549	7.5725	3-10keV
0.94517	0.0882	7.6443	3-10keV
0.94526	15.9892	11.276	3-10keV
0.94535	35.4216	14.6096	3-10keV
0.94545	11.2575	10.5245	3-10keV
0.94554	19.3328	12.8212	3-10keV
0.94563	-3.1451	8.9904	3-10keV
0.94572	-13.8902	6.9118	3-10keV
0.94582	-1.9319	8.9126	3-10keV
0.94591	0.703	7.6336	3-10keV
0.946	-12.4811	5.2263	3-10keV
0.94609	0.9891	9.8741	3-10keV
0.94619	-8.3425	6.6559	3-10keV
0.94628	4.6579	9.7465	3-10keV
0.94637	1.76	8.7837	3-10keV
0.94646	-0.6971	8.8706	3-10keV
0.94656	-13.7116	5.2985	3-10keV
0.94665	8.188	10.6105	3-10keV
0.94674	7.1238	9.68	3-10keV
0.94684	4.0515	9.7718	3-10keV
0.94693	8.7869	10.5893	3-10keV
0.94702	-3.5994	7.8181	3-10keV
0.94711	-13.7158	5.2983	3-10keV
0.94721	-5.4491	7.8905	3-10keV
0.9473	0.3572	9.8995	3-10keV
0.94739	10.0291	10.5634	3-10keV
0.94748	0.5351	8.8471	3-10keV
0.94758	-2.7195	9.9851	3-10keV
0.94767	-5.4485	7.9005	3-10keV
0.94776	-1.3186	8.908	3-10keV
0.94785	-14.6764	8.2402	3-10keV
0.94795	2.3713	8.7622	3-10keV
0.94804	-12.0226	6.8202	3-10keV
0.94813	-11.5823	8.1116	3-10keV
0.94822	-4.0348	6.4488	3-10keV
0.94832	-14.9181	5.3594	3-10keV
0.94841	-3.5992	7.8219	3-10keV
0.9485	-7.7406	6.6401	3-10keV
0.94859	-2.9812	7.793	3-10keV
0.94869	12.4827	10.4841	3-10keV
0.94878	0.541	8.856	3-10keV
0.94887	-12.4828	5.2231	3-10keV
0.94896	8.7932	10.5929	3-10keV
0.94906	-11.5921	8.1182	3-10keV
0.94915	-1.7533	7.7421	3-10keV
0.94924	2.6456	10.7817	3-10keV
0.94934	0.7004	7.6297	3-10keV
0.94943	-12.9035	4.5734	3-10keV
0.94952	-8.327	6.6425	3-10keV
0.94961	5.7259	10.6758	3-10keV
0.94971	6.9463	10.6441	3-10keV
0.9498	-4.2171	7.8374	3-10keV
0.94989	0.9733	9.8685	3-10keV
0.94998	-8.9433	6.6799	3-10keV
0.95008	3.4281	9.7985	3-10keV
0.95017	12.3345	11.4071	3-10keV
0.95026	-10.2038	6.7511	3-10keV
0.95035	4.2317	8.7255	3-10keV
0.95045	13.0987	10.4712	3-10keV
0.95054	-10.1848	6.7393	3-10keV
0.95063	-10.7969	6.7661	3-10keV
0.95072	1.3221	7.6137	3-10keV
0.95082	-7.5449	4.9163	3-10keV
0.95091	0.5245	8.8319	3-10keV
0.951	-1.4826	9.9644	3-10keV
0.95109	-10.0334	5.0848	3-10keV
0.95119	-4.045	6.4582	3-10keV
0.95128	-3.1721	8.9804	3-10keV
0.95137	-18.6422	5.5758	3-10keV
0.95146	-3.3339	10.0003	3-10keV
0.95156	19.4959	12.0238	3-10keV
0.95165	-4.6496	6.4754	3-10keV
0.95174	-10.7993	6.7699	3-10keV
0.95184	-1.1478	7.6862	3-10keV
0.95193	3.4248	9.7936	3-10keV
0.95202	31.8985	13.9982	3-10keV
0.95211	1.7642	8.7964	3-10keV
0.95221	-8.9699	6.6917	3-10keV
0.9523	4.0435	9.7703	3-10keV
0.95239	-4.8269	7.8609	3-10keV
0.95248	-2.5424	8.9419	3-10keV
0.95258	-6.497	6.571	3-10keV
0.95267	0.9664	9.8552	3-10keV
0.95276	1.1451	8.8005	3-10keV
0.95285	-11.4029	6.7894	3-10keV
0.95295	-5.0842	4.7558	3-10keV
0.95304	9.4493	10.6165	3-10keV
0.95313	1.1406	8.8106	3-10keV
0.95322	-6.6816	7.931	3-10keV
0.95332	-12.047	6.8357	3-10keV
0.95341	6.5088	9.6996	3-10keV
0.9535	-5.2715	6.5181	3-10keV
0.95359	-0.2578	9.9158	3-10keV
0.95369	10.6461	10.5463	3-10keV
0.95378	7.118	9.668	3-10keV
0.95387	-2.9843	7.8048	3-10keV
0.95396	4.0314	9.7622	3-10keV
0.95406	1.3172	7.612	3-10keV
0.95415	11.1002	11.438	3-10keV
0.95424	-7.131	6.6187	3-10keV
0.95434	-5.2791	6.5228	3-10keV
0.95443	-8.9633	6.6924	3-10keV
0.95452	-3.1585	8.9458	3-10keV
0.95461	-2.9776	7.7758	3-10keV
0.95471	-1.1198	7.6956	3-10keV
0.9548	1.1394	8.7998	3-10keV
0.95489	12.3206	11.3946	3-10keV
0.95498	6.0615	8.6406	3-10keV
0.95508	-11.8932	5.2046	3-10keV
0.95517	12.9386	11.3695	3-10keV
0.95526	-5.8797	6.5405	3-10keV
0.95535	1.5922	9.8578	3-10keV
0.95545	-1.3175	8.8956	3-10keV
0.95554	-13.704	5.2922	3-10keV
0.95563	-1.7537	7.7368	3-10keV
0.95572	-5.7074	4.8057	3-10keV
0.95582	1.7737	8.7851	3-10keV
0.95591	2.8066	9.8036	3-10keV
0.956	-1.9386	8.9375	3-10keV
0.95609	-3.1698	8.9551	3-10keV
0.95619	-0.6927	8.8936	3-10keV
0.95628	-3.5981	7.8156	3-10keV
0.95637	-1.3278	8.9044	3-10keV
0.95646	4.2206	8.7091	3-10keV
0.95656	0.0889	7.6609	3-10keV
0.95665	7.567	10.6351	3-10keV
0.95674	-7.1235	6.6112	3-10keV
0.95684	-4.2185	7.8227	3-10keV
0.95693	-5.6153	9.0768	3-10keV
0.95702	-6.5072	6.5691	3-10keV
0.95711	7.1068	9.6601	3-10keV
0.95721	-0.0782	8.8547	3-10keV
0.9573	-2.374	7.7684	3-10keV
0.95739	0.5326	8.8519	3-10keV
0.95748	4.8381	8.6927	3-10keV
0.95758	-3.7943	9.0012	3-10keV
0.95767	6.5117	9.7053	3-10keV
0.95776	4.6667	9.7553	3-10keV
0.95785	2.6401	10.763	3-10keV
0.95795	-8.9768	6.693	3-10keV
0.95804	-1.1474	7.713	3-10keV
0.95813	4.8399	8.6939	3-10keV
0.95822	7.0965	9.6585	3-10keV
0.95832	2.3635	8.7671	3-10keV
0.95841	-2.9807	7.7901	3-10keV
0.9585	2.6525	10.7902	3-10keV
0.95859	17.0296	12.087	3-10keV
0.95869	-1.312	8.8928	3-10keV
0.95878	0.5318	8.8269	3-10keV
0.95887	-4.3926	9.0073	3-10keV
0.95896	-1.9328	8.9167	3-10keV
0.95906	0.357	9.8833	3-10keV
0.95915	2.6463	10.7847	3-10keV
0.95924	-2.9894	7.8029	3-10keV
0.95934	1.7702	8.801	3-10keV
0.95943	-1.315	8.8672	3-10keV
0.95952	-1.7584	7.7267	3-10keV
0.95961	0.0854	7.6643	3-10keV
0.95971	-3.5959	7.811	3-10keV
0.9598	-14.9323	5.3637	3-10keV
0.95989	-1.1376	7.6982	3-10keV
0.95998	13.5295	11.3439	3-10keV
0.96008	7.566	10.6337	3-10keV
0.96017	-5.278	6.5273	3-10keV
0.96026	-4.8273	7.8648	3-10keV
0.96035	-10.2022	6.7477	3-10keV
0.96045	-17.8465	4.8959	3-10keV
0.96054	-10.365	8.0732	3-10keV
0.96063	-6.678	7.9375	3-10keV
0.96072	2.2035	9.8424	3-10keV
0.96082	-2.3549	7.75	3-10keV
0.96091	-6.0584	7.929	3-10keV
0.961	-11.8993	5.2017	3-10keV
0.96109	-2.5422	8.9611	3-10keV
0.96119	17.0705	12.1081	3-10keV
0.96128	-16.5747	4.8127	3-10keV
0.96137	14.1254	11.3137	3-10keV
0.96146	1.9378	7.5881	3-10keV
0.96156	-6.5032	6.5778	3-10keV
0.96165	-0.2549	9.9116	3-10keV
0.96174	-7.7388	6.6401	3-10keV
0.96184	-12.0397	6.8253	3-10keV
0.96193	-10.9446	8.0779	3-10keV
0.96202	7.1259	9.6827	3-10keV
0.96211	-16.7906	5.4711	3-10keV
0.96221	0.5375	8.8498	3-10keV
0.9623	10.0139	10.5517	3-10keV
0.96239	0.36	9.891	3-10keV
0.96248	-7.8963	7.9657	3-10keV
0.96258	0.9644	9.8776	3-10keV
0.96267	-1.143	7.7095	3-10keV
0.96276	-5.2752	6.5172	3-10keV
0.96285	-5.4497	7.8955	3-10keV
0.96295	1.4065	10.8086	3-10keV
0.96304	-0.0829	8.8685	3-10keV
0.96313	0.3538	9.9074	3-10keV
0.96322	-7.8941	7.9798	3-10keV
0.96332	-6.9292	4.8779	3-10keV
0.96341	5.7257	10.6822	3-10keV
0.9635	-3.5974	7.8312	3-10keV
0.96359	-3.6079	7.8259	3-10keV
0.96369	-4.8308	7.8592	3-10keV
0.96378	16.015	11.2966	3-10keV
0.96387	-10.8109	6.7745	3-10keV
0.96396	-21.0847	5.7064	3-10keV
0.96406	-15.5628	5.4063	3-10keV
0.96415	-14.7408	4.6948	3-10keV
0.96424	3.168	7.5367	3-10keV
0.96434	-12.0079	6.8091	3-10keV
0.96443	5.7318	10.6908	3-10keV
0.96452	19.3708	12.8475	3-10keV
0.96461	-7.1025	6.6034	3-10keV
0.96471	-3.5961	7.8275	3-10keV
0.9648	20.7754	12.0203	3-10keV
0.96489	5.9015	9.7309	3-10keV
0.96498	5.7255	10.6964	3-10keV
0.96508	5.7411	10.7161	3-10keV
0.96517	-10.0331	5.0835	3-10keV
0.96526	-9.3249	9.187	3-10keV
0.96535	-3.1628	8.9762	3-10keV
0.96545	-1.6504	10.8886	3-10keV
0.96554	0.5306	8.8348	3-10keV
0.96563	-1.6643	10.903	3-10keV
0.96572	-2.9829	7.792	3-10keV
0.96582	8.6162	11.4849	3-10keV
0.96591	-3.5976	7.8077	3-10keV
0.966	10.4559	11.4245	3-10keV
0.96609	-9.4707	10.175	3-10keV
0.96619	-9.1353	8.0184	3-10keV
0.96628	-2.983	7.7857	3-10keV
0.96637	-6.236	9.0744	3-10keV
0.96646	-3.7892	8.9991	3-10keV
0.96656	-4.6621	6.4992	3-10keV
0.96665	-2.3726	7.7695	3-10keV
0.96674	-5.2703	6.5141	3-10keV
0.96684	-0.5227	7.6919	3-10keV
0.96693	-17.2465	4.859	3-10keV
0.96702	-6.6731	7.934	3-10keV
0.96711	3.4346	9.7986	3-10keV
0.96721	2.5536	7.5741	3-10keV
0.9673	-0.0839	8.8696	3-10keV
0.96739	0.9732	9.8784	3-10keV
0.96748	-4.8245	7.8582	3-10keV
0.96758	3.2573	10.7523	3-10keV
0.96767	-0.6989	8.8822	3-10keV
0.96776	-13.0892	5.2575	3-10keV
0.96785	-17.8149	4.8919	3-10keV
0.96795	-14.9451	5.3715	3-10keV
0.96804	9.2467	11.4852	3-10keV
0.96813	5.7123	10.6707	3-10keV
0.96822	-8.3364	6.6547	3-10keV
0.96832	-10.6329	5.1145	3-10keV
0.96841	1.1496	8.8233	3-10keV
0.9685	15.3963	11.312	3-10keV
0.96859	-7.4657	9.1001	3-10keV
0.96869	-3.7691	8.9931	3-10keV
0.96878	-1.7524	7.7551	3-10keV
0.96887	-18.6557	5.584	3-10keV
0.96896	6.7738	11.542	3-10keV
0.96906	-0.0803	8.8722	3-10keV
0.96915	-13.2782	6.888	3-10keV
0.96924	-10.1947	6.7459	3-10keV
0.96934	21.2157	12.8003	3-10keV
0.96943	-0.0835	8.8662	3-10keV
0.96952	1.7625	8.809	3-10keV
0.96961	9.8524	11.4625	3-10keV
0.96971	2.8263	9.8107	3-10keV
0.9698	4.0452	9.7679	3-10keV
0.96989	4.2213	8.7044	3-10keV
0.96998	-9.5796	6.7204	3-10keV
0.97008	1.7633	8.8098	3-10keV
0.97017	0.5369	8.851	3-10keV
0.97026	4.6551	9.7511	3-10keV
0.97035	-13.6885	5.2854	3-10keV
0.97045	-7.307	7.9591	3-10keV
0.97054	-0.0799	8.8832	3-10keV
0.97063	-3.7769	9.0015	3-10keV
0.97072	10.2979	12.2773	3-10keV
0.97082	13.1216	10.4846	3-10keV
0.97091	9.5979	9.6022	3-10keV
0.971	8.7852	10.5832	3-10keV
0.97109	-8.517	8.0088	3-10keV
0.97119	-6.0651	7.915	3-10keV
0.97128	10.0257	10.5577	3-10keV
0.97137	-4.3808	8.9934	3-10keV
0.97146	11.2559	10.5248	3-10keV
0.97156	-7.2913	7.9554	3-10keV
0.97165	-13.7165	5.299	3-10keV
0.97174	-4.3941	9.0371	3-10keV
0.97184	-2.3757	7.7804	3-10keV
0.97193	-7.0951	6.6018	3-10keV
0.97202	-19.8588	5.6433	3-10keV
0.97211	-14.3222	5.3305	3-10keV
0.97221	5.1037	10.7097	3-10keV
0.9723	-4.8362	7.8731	3-10keV
0.97239	-12.8359	8.1717	3-10keV
0.97248	-7.727	6.6255	3-10keV
0.97258	-4.3927	9.0114	3-10keV
0.97267	7.391	11.5241	3-10keV
0.97276	-11.3993	6.8002	3-10keV
0.97285	-11.2384	5.1472	3-10keV
0.97295	0.9695	9.8558	3-10keV
0.97304	-1.1327	7.7249	3-10keV
0.97313	4.0495	9.7712	3-10keV
0.97322	-7.1146	6.6077	3-10keV
0.97332	-3.1598	8.9679	3-10keV
0.97341	4.8362	8.681	3-10keV
0.9735	-11.4258	6.7987	3-10keV
0.97359	16.0023	11.288	3-10keV
0.97369	-0.0807	8.8715	3-10keV
0.97378	1.7638	8.8059	3-10keV
0.97387	-9.7485	8.0445	3-10keV
0.97396	5.7221	10.6927	3-10keV
0.97406	-6.8599	9.1033	3-10keV
0.97415	-19.6695	5.0077	3-10keV
0.97424	1.5639	9.8535	3-10keV
0.97434	12.3179	11.3775	3-10keV
0.97443	-3.1506	8.9627	3-10keV
0.97452	9.4074	10.5743	3-10keV
0.97461	-4.2215	7.8521	3-10keV
0.97471	16.4823	12.1434	3-10keV
0.9748	5.1197	10.7325	3-10keV
0.97489	-6.0386	7.902	3-10keV
0.97498	-10.3531	8.0717	3-10keV
0.97508	-18.0192	5.542	3-10keV
0.97517	2.9928	8.7575	3-10keV
0.97526	-2.1019	9.9945	3-10keV
0.97535	1.1349	8.8048	3-10keV
0.97545	-15.0957	6.958	3-10keV
0.97554	-4.2044	7.8199	3-10keV
0.97563	-4.6437	6.4936	3-10keV
0.97572	3.8756	10.746	3-10keV
0.97582	7.1082	9.6663	3-10keV
0.97591	-15.3109	8.2678	3-10keV
0.976	-3.1514	8.9745	3-10keV
0.97609	1.7614	8.8002	3-10keV
0.97619	7.5706	10.6391	3-10keV
0.97628	12.7377	12.1884	3-10keV
0.97637	4.4937	10.7138	3-10keV
0.97646	-11.5835	8.1109	3-10keV
0.97656	4.9586	11.605	3-10keV
0.97665	15.6763	12.934	3-10keV
0.97847	5.344	6.7327	3-10keV
0.97857	-7.4039	4.6924	3-10keV
0.97866	-2.6481	4.9855	3-10keV
0.97875	15.673	8.0596	3-10keV
0.97884	-9.3953	4.233	3-10keV
0.97894	-7.8132	4.1625	3-10keV
0.97903	26.7904	8.9251	3-10keV
0.97912	-1.8351	5.4115	3-10keV
0.97922	2.1127	5.6926	3-10keV
0.97931	-0.6177	6.1899	3-10keV
0.9794	-2.6116	5.8606	3-10keV
0.97949	7.6962	6.6636	3-10keV
0.97959	9.2566	6.6109	3-10keV
0.97968	1.3707	6.4986	3-10keV
0.97977	13.6521	7.1854	3-10keV
0.97986	1.3106	5.292	3-10keV
0.97996	2.0948	5.2618	3-10keV
0.98005	7.6746	6.2994	3-10keV
0.98014	4.9415	6.7489	3-10keV
0.98023	-7.7996	4.7003	3-10keV
0.98033	2.5358	6.0876	3-10keV
0.98042	-8.6388	3.5993	3-10keV
0.98051	1.6867	4.8108	3-10keV
0.9806	8.4936	6.649	3-10keV
0.9807	-2.2823	4.4655	3-10keV
0.98079	-6.2246	4.6368	3-10keV
0.98088	-1.4703	4.9384	3-10keV
0.98097	-1.8869	4.436	3-10keV
0.98107	2.9173	5.6619	3-10keV
0.98116	-12.1769	3.0855	3-10keV
0.98125	-6.2352	4.0873	3-10keV
0.98134	2.0819	4.793	3-10keV
0.98144	3.7169	6.0446	3-10keV
0.98153	-11.7752	3.7583	3-10keV
0.98162	-2.3013	3.8905	3-10keV
0.98172	-4.2431	4.5432	3-10keV
0.98181	1.735	5.7119	3-10keV
0.9819	1.7059	5.281	3-10keV
0.98199	4.5038	6.0171	3-10keV
0.98209	-8.6196	3.5894	3-10keV
0.98218	-1.8621	4.9518	3-10keV
0.98227	-11.8286	2.7724	3-10keV
0.98236	0.9381	5.7366	3-10keV
0.98246	-5.4518	4.0486	3-10keV
0.98255	-0.2647	5.3463	3-10keV
0.98264	-6.6649	3.4821	3-10keV
0.98273	4.9104	6.0188	3-10keV
0.98283	-5.831	4.6211	3-10keV
0.98292	0.1291	5.3315	3-10keV
0.98301	1.7168	5.7102	3-10keV
0.9831	-4.6561	4.018	3-10keV
0.9832	-0.6319	5.7846	3-10keV
0.98329	1.7315	5.7138	3-10keV
0.98338	5.6952	6.3671	3-10keV
0.98347	11.2671	6.9131	3-10keV
0.98357	6.4844	6.3308	3-10keV
0.98366	0.5251	5.3139	3-10keV
0.98375	2.5141	5.6747	3-10keV
0.98384	-5.838	4.0636	3-10keV
0.98394	5.2895	5.9925	3-10keV
0.98403	17.2771	8.0352	3-10keV
0.98412	0.9151	5.3035	3-10keV
0.98422	0.5499	5.7382	3-10keV
0.98431	2.0864	5.2524	3-10keV
0.9844	-0.2214	6.1779	3-10keV
0.98449	9.6377	6.238	3-10keV
0.98459	13.2477	7.19	3-10keV
0.98468	-1.0964	4.4052	3-10keV
0.98477	8.0919	6.6564	3-10keV
0.98486	-5.0599	4.0345	3-10keV
0.98496	-9.8187	3.6603	3-10keV
0.98505	4.918	6.3894	3-10keV
0.98514	-4.2504	4.5464	3-10keV
0.98523	-7.0121	4.6723	3-10keV
0.98533	-2.2528	4.9648	3-10keV
0.98542	-1.3825	6.5718	3-10keV
0.98551	-4.6398	4.5621	3-10keV
0.9856	-4.2837	3.9928	3-10keV
0.9857	0.5526	5.7539	3-10keV
0.98579	2.1336	6.0936	3-10keV
0.98588	10.0747	6.6054	3-10keV
0.98597	-4.2333	5.0482	3-10keV
0.98607	-0.6549	5.369	3-10keV
0.98616	0.875	4.3188	3-10keV
0.98625	-5.8454	4.0682	3-10keV
0.98634	-4.2325	5.0459	3-10keV
0.98644	9.3145	6.9772	3-10keV
0.98653	-4.6624	4.0101	3-10keV
0.98662	2.5539	6.4528	3-10keV
0.98672	-0.2875	4.877	3-10keV
0.98681	1.7447	6.1011	3-10keV
0.9869	-3.0503	4.9929	3-10keV
0.98699	-5.0402	4.5844	3-10keV
0.98709	-5.8495	4.0713	3-10keV
0.98718	1.7051	5.2783	3-10keV
0.98727	-0.6816	4.9038	3-10keV
0.98736	3.7245	6.0513	3-10keV
0.98746	-10.5535	4.8159	3-10keV
0.98755	6.4955	6.3437	3-10keV
0.98764	-3.4515	5.0059	3-10keV
0.98773	0.8943	4.8324	3-10keV
0.98783	12.4605	7.2143	3-10keV
0.98792	24.0061	8.4448	3-10keV
0.98801	0.5229	5.3208	3-10keV
0.9881	6.4872	5.9617	3-10keV
0.9882	-1.0577	5.379	3-10keV
0.98829	8.0747	6.292	3-10keV
0.98838	-2.2168	5.8437	3-10keV
0.98847	0.9173	5.3058	3-10keV
0.98857	-5.0602	4.0322	3-10keV
0.98866	-5.0632	4.035	3-10keV
0.98875	-9.7788	4.7869	3-10keV
0.98884	-1.4422	5.3934	3-10keV
0.98894	-0.2886	4.8825	3-10keV
0.98903	4.5076	6.0226	3-10keV
0.98912	5.2859	5.9903	3-10keV
0.98922	3.2773	5.2077	3-10keV
0.98931	5.2652	5.5742	3-10keV
0.9894	-10.1983	3.6727	3-10keV
0.98949	-3.856	4.5309	3-10keV
0.98959	10.501	7.2693	3-10keV
0.98968	5.7285	6.7226	3-10keV
0.98977	-1.4924	4.4258	3-10keV
0.98986	0.5019	4.8605	3-10keV
0.98996	10.1198	7.2892	3-10keV
0.99005	10.0946	6.9553	3-10keV
0.99014	-0.6636	5.3631	3-10keV
0.99023	-8.9787	4.7479	3-10keV
0.99033	1.3418	6.1155	3-10keV
0.99042	-0.652	5.3612	3-10keV
0.99051	-5.4731	3.4137	3-10keV
0.9906	12.8093	6.5097	3-10keV
0.9907	2.1124	5.684	3-10keV
0.99079	2.5386	6.0755	3-10keV
0.99088	2.1102	5.6855	3-10keV
0.99097	-3.8737	3.9702	3-10keV
0.99107	5.74	6.7339	3-10keV
0.99116	-0.6439	5.7879	3-10keV
0.99125	-3.4582	4.5095	3-10keV
0.99134	-0.6049	6.1931	3-10keV
0.99144	-7.8336	4.1735	3-10keV
0.99153	-14.1437	4.459	3-10keV
0.99162	-4.6678	4.0099	3-10keV
0.99172	1.7087	5.2723	3-10keV
0.99181	4.9185	6.3852	3-10keV
0.9919	10.0561	6.5932	3-10keV
0.99199	-4.2374	4.5412	3-10keV
0.99209	-4.6599	4.0043	3-10keV
0.99218	3.6907	5.6383	3-10keV
0.99227	8.082	6.6461	3-10keV
0.99236	0.9121	5.3	3-10keV
0.99246	1.7274	5.7132	3-10keV
0.99255	1.7043	5.2761	3-10keV
0.99264	-0.2669	5.3505	3-10keV
0.99273	-2.631	5.4385	3-10keV
0.99283	-5.0383	4.5802	3-10keV
0.99292	0.5021	4.8538	3-10keV
0.99301	-0.6601	5.366	3-10keV
0.9931	-2.6957	3.9154	3-10keV
0.9932	-0.2696	5.3492	3-10keV
0.99329	-8.9994	4.2186	3-10keV
0.99338	-7.7781	5.1829	3-10keV
0.99347	4.946	6.7569	3-10keV
0.99357	-6.6354	4.1086	3-10keV
0.99366	2.488	5.2408	3-10keV
0.99375	16.8973	8.3291	3-10keV
0.99384	-0.6751	4.903	3-10keV
0.99394	-3.8542	4.531	3-10keV
0.99403	-6.2203	4.6356	3-10keV
0.99412	0.9419	5.7328	3-10keV
0.99422	-1.0511	5.3771	3-10keV
0.99431	10.9197	7.5821	3-10keV
0.9944	4.1249	6.4064	3-10keV
0.99449	2.1644	6.4771	3-10keV
0.99459	-4.2359	5.0441	3-10keV
0.99468	11.6553	6.9001	3-10keV
0.99477	-0.9965	6.5695	3-10keV
0.99486	-3.0651	4.4948	3-10keV
0.99496	4.9404	6.7498	3-10keV
0.99505	6.4933	6.3371	3-10keV
0.99514	6.4935	5.9607	3-10keV
0.99523	8.8932	6.6361	3-10keV
0.99533	-3.477	3.9479	3-10keV
0.99542	2.9144	6.0703	3-10keV
0.99551	2.1162	5.2671	3-10keV
0.9956	3.323	6.0546	3-10keV
0.9957	9.2803	6.6242	3-10keV
0.99579	-0.2378	5.7635	3-10keV
0.99588	2.0874	5.2491	3-10keV
0.99597	7.2824	6.3136	3-10keV
0.99607	-5.8834	3.4376	3-10keV
0.99616	-5.4336	4.6071	3-10keV
0.99625	-4.6881	3.3669	3-10keV
0.99634	-1.0517	5.3755	3-10keV
0.99644	6.4763	5.9547	3-10keV
0.99653	-1.4482	5.3961	3-10keV
0.99662	-3.0231	5.4534	3-10keV
0.99672	-3.0663	4.4956	3-10keV
0.99681	-2.2358	5.4226	3-10keV
0.9969	-1.8659	4.9538	3-10keV
0.99699	-2.6774	4.4864	3-10keV
0.99709	-3.4393	5.0099	3-10keV
0.99718	1.3284	5.7132	3-10keV
0.99727	-5.8598	3.4323	3-10keV
0.99736	4.1269	6.4035	3-10keV
0.99746	-10.9986	3.7251	3-10keV
0.99755	3.3317	6.0662	3-10keV
0.99764	-0.6388	5.7923	3-10keV
0.99773	-6.6112	4.6502	3-10keV
0.99783	-0.7033	4.395	3-10keV
0.99792	3.3473	6.4367	3-10keV
0.99801	-2.6485	4.969	3-10keV
0.9981	6.4646	5.9454	3-10keV
0.9982	-0.314	4.3676	3-10keV
0.99829	-0.2224	6.1747	3-10keV
0.99838	3.7089	6.0411	3-10keV
0.99847	-2.6533	4.9799	3-10keV
0.99857	-0.6992	4.4006	3-10keV
0.99866	-3.0209	5.4571	3-10keV
0.99875	-1.051	5.3791	3-10keV
0.99884	4.072	5.1907	3-10keV
0.99894	-1.4233	5.8205	3-10keV
0.99903	-6.6142	4.6507	3-10keV
0.99912	12.4566	6.8836	3-10keV
0.99922	-1.8642	4.9485	3-10keV
0.99931	-3.8334	5.0243	3-10keV
0.9994	-4.682	3.3659	3-10keV
0.99949	-6.6447	3.4769	3-10keV
0.99959	2.9006	5.6588	3-10keV
0.99968	-1.0955	4.4069	3-10keV
0.99977	-3.0446	4.9948	3-10keV
0.99986	6.4947	6.338	3-10keV
0.99996	3.7117	6.0392	3-10keV
1.00005	0.5009	4.8523	3-10keV
1.00014	0.8966	4.841	3-10keV
1.00023	-1.0755	4.9144	3-10keV
1.00033	3.2967	5.6444	3-10keV
1.00042	-3.8799	3.9674	3-10keV
1.00051	3.6926	5.6345	3-10keV
1.0006	-7.8235	3.5459	3-10keV
1.0007	3.3443	6.4379	3-10keV
1.00079	7.2663	5.9311	3-10keV
1.00088	-0.6354	5.788	3-10keV
1.00097	0.1695	6.1544	3-10keV
1.00107	7.6735	6.2983	3-10keV
1.00116	1.7017	5.2719	3-10keV
1.00125	3.743	6.4278	3-10keV
1.00134	-7.0111	4.663	3-10keV
1.00144	2.1403	6.087	3-10keV
1.00153	2.4888	5.239	3-10keV
1.00162	6.5346	7.0439	3-10keV
1.00172	-1.4255	5.8184	3-10keV
1.00181	-2.6524	4.9854	3-10keV
1.0019	-1.0079	6.1983	3-10keV
1.00199	5.3103	6.3758	3-10keV
1.00209	4.0927	5.629	3-10keV
1.00218	3.3178	6.0598	3-10keV
1.00227	-0.6625	5.3599	3-10keV
1.00236	0.5193	5.3191	3-10keV
1.00246	2.9315	6.0757	3-10keV
1.00255	1.7663	6.4873	3-10keV
1.00264	0.1502	5.7567	3-10keV
1.00273	4.5074	6.018	3-10keV
1.00283	0.5459	5.7539	3-10keV
1.00292	6.8909	6.3269	3-10keV
1.00301	0.5425	5.7464	3-10keV
1.0031	9.3139	7.3002	3-10keV
1.0032	0.1729	6.1551	3-10keV
1.00329	8.4412	5.8862	3-10keV
1.00338	7.6622	6.2947	3-10keV
1.00347	-1.0737	4.909	3-10keV
1.00357	9.6829	6.9557	3-10keV
1.00366	6.1461	7.0606	3-10keV
1.00375	11.6639	6.9021	3-10keV
1.00384	10.06	6.5981	3-10keV
1.00394	4.1063	6.0322	3-10keV
1.00403	11.2991	7.5621	3-10keV
1.00412	4.1432	6.7712	3-10keV
1.00422	-1.4289	5.8264	3-10keV
1.00431	-5.366	5.5433	3-10keV
1.0044	3.7124	6.0376	3-10keV
1.00449	1.7219	5.7017	3-10keV
1.00459	9.3459	7.6244	3-10keV
1.00468	2.1255	5.6978	3-10keV
1.00477	2.089	5.2601	3-10keV
1.00486	-1.0533	5.383	3-10keV
1.00496	-1.0126	6.1996	3-10keV
1.00505	-1.4066	6.215	3-10keV
1.00514	6.1269	6.7172	3-10keV
1.00523	-3.7913	5.8991	3-10keV
1.00533	-2.6519	4.9818	3-10keV
1.00542	-0.6595	5.3606	3-10keV
1.00551	-12.5852	3.1161	3-10keV
1.0056	-15.2933	4.4951	3-10keV
1.0057	-2.2272	5.4215	3-10keV
1.00579	-2.6819	4.4782	3-10keV
1.00588	4.9163	6.3841	3-10keV
1.00597	-6.2179	4.6327	3-10keV
1.00607	15.6626	7.7647	3-10keV
1.00616	-1.8767	4.4491	3-10keV
1.00625	8.8727	6.271	3-10keV
1.00634	3.346	6.4376	3-10keV
1.00644	14.9021	7.4958	3-10keV
1.00653	2.1757	6.8312	3-10keV
1.00662	21.9617	8.1874	3-10keV
1.00672	9.7333	7.6117	3-10keV
1.00681	20.8887	8.53	3-10keV
1.0069	-7.4216	4.1444	3-10keV
1.00699	4.9343	6.3984	3-10keV
1.00709	11.667	6.9078	3-10keV
1.00718	12.8851	7.2163	3-10keV
1.00727	6.5232	6.7117	3-10keV
1.00736	3.7144	6.0417	3-10keV
1.00746	0.5174	5.3192	3-10keV
1.00755	12.8933	7.5316	3-10keV
1.00764	20.8394	8.5107	3-10keV
1.00773	-3.8045	5.4737	3-10keV
1.00783	12.1196	7.5576	3-10keV
1.00792	4.1663	6.7727	3-10keV
1.00801	6.8796	6.3238	3-10keV
1.0081	9.7192	7.2978	3-10keV
1.0082	14.0905	7.5065	3-10keV
1.00829	3.7016	5.6462	3-10keV
1.00838	6.5199	6.706	3-10keV
1.00847	3.299	5.6513	3-10keV
1.00857	-6.1568	5.9735	3-10keV
1.00866	14.4556	7.1707	3-10keV
1.00875	8.9217	6.9976	3-10keV
1.00884	1.7233	5.716	3-10keV
1.00894	8.52	6.9991	3-10keV
1.00903	15.3444	8.3829	3-10keV
1.00912	16.4412	7.7421	3-10keV
1.00922	21.611	8.2115	3-10keV
1.00931	2.1636	6.4716	3-10keV
1.0094	10.499	7.2707	3-10keV
1.00949	4.1584	6.778	3-10keV
1.00959	16.464	7.7525	3-10keV
1.00968	-5.4134	5.0935	3-10keV
1.00977	3.36	6.4533	3-10keV
1.00986	-1.0166	6.2017	3-10keV
1.00996	13.6749	7.5089	3-10keV
1.01005	8.9292	7.3172	3-10keV
1.01014	8.5073	6.9913	3-10keV
1.01023	14.8918	8.0824	3-10keV
1.01033	-0.2255	6.1662	3-10keV
1.01042	0.169	6.1611	3-10keV
1.01051	20.1061	8.8175	3-10keV
1.0106	9.3245	7.3056	3-10keV
1.0107	-1.0494	5.3743	3-10keV
1.01079	-5.015	5.069	3-10keV
1.01088	7.6998	6.666	3-10keV
1.01097	-8.9695	4.7582	3-10keV
1.01107	-3.8093	5.4861	3-10keV
1.01116	14.9046	8.0905	3-10keV
1.01125	15.2986	8.0817	3-10keV
1.01134	7.7399	7.3423	3-10keV
1.01144	6.5367	7.0458	3-10keV
1.01153	19.2337	7.9799	3-10keV
1.01162	15.6714	7.7713	3-10keV
1.01172	4.1142	6.0371	3-10keV
1.01181	9.3261	7.3091	3-10keV
1.0119	19.2939	8.5621	3-10keV
1.01199	13.7431	8.1292	3-10keV
1.01209	4.8833	5.6021	3-10keV
1.01218	1.7981	6.8513	3-10keV
1.01227	-1.381	6.5921	3-10keV
1.01236	-3.0448	4.9907	3-10keV
1.01246	6.8773	5.944	3-10keV
1.01255	-1.0748	4.9225	3-10keV
1.01264	12.4553	6.8838	3-10keV
1.01273	2.146	6.1008	3-10keV
1.01283	1.3308	5.7155	3-10keV
1.01292	8.8757	6.9604	3-10keV
1.01301	12.82	6.8576	3-10keV
1.0131	-2.2629	4.9643	3-10keV
1.0132	-3.0521	5.0026	3-10keV
1.01329	-7.408	4.6873	3-10keV
1.01338	2.5148	5.6804	3-10keV
1.01347	10.4985	7.2691	3-10keV
1.01357	-0.2664	5.3479	3-10keV
1.01366	-5.4553	4.0523	3-10keV
1.01375	-3.3976	5.8819	3-10keV
1.01384	6.5301	7.0453	3-10keV
1.01394	9.6836	6.9568	3-10keV
1.01403	14.054	7.4933	3-10keV
1.01412	0.1919	6.5414	3-10keV
1.01422	11.3496	7.8889	3-10keV
1.01431	0.9621	6.1387	3-10keV
1.0144	-6.2155	4.628	3-10keV
1.01449	7.7424	7.3416	3-10keV
1.01459	5.709	6.365	3-10keV
1.01468	8.9308	7.3188	3-10keV
1.01477	5.3884	7.4136	3-10keV
1.01486	6.1248	6.7172	3-10keV
1.01496	9.7168	7.2957	3-10keV
1.01505	4.5266	6.4073	3-10keV
1.01514	1.7916	6.8516	3-10keV
1.01523	-1.8493	5.4063	3-10keV
1.01533	6.5225	6.7094	3-10keV
1.01542	1.7007	5.2793	3-10keV
1.01551	0.9299	5.7359	3-10keV
1.0156	4.1185	6.0428	3-10keV
1.0157	14.9191	8.0985	3-10keV
1.01579	8.1539	7.3387	3-10keV
1.01588	0.5395	5.736	3-10keV
1.01597	18.8463	8.5529	3-10keV
1.01607	-1.4498	5.3894	3-10keV
1.01616	0.1743	6.1595	3-10keV
1.01625	8.4943	6.6475	3-10keV
1.01634	-4.9938	5.5192	3-10keV
1.01644	3.7294	6.4196	3-10keV
1.01653	8.0837	6.6486	3-10keV
1.01662	0.9391	5.7314	3-10keV
1.01672	6.0938	6.3463	3-10keV
1.01681	-4.2493	4.5464	3-10keV
1.0169	2.5361	6.0821	3-10keV
1.01699	-1.8175	5.8246	3-10keV
1.01709	-10.2237	2.9643	3-10keV
1.01718	-5.8486	4.0662	3-10keV
1.01727	1.725	5.7074	3-10keV
1.01736	1.3116	5.2953	3-10keV
1.01949	11.3984	9.522	3-10keV
1.01959	-7.9034	4.6256	3-10keV
1.01968	-4.175	5.9413	3-10keV
1.01977	-1.5839	5.8136	3-10keV
1.01986	5.2371	7.8797	3-10keV
1.01996	4.5736	7.8972	3-10keV
1.02005	8.4607	7.7403	3-10keV
1.02014	-4.1817	5.943	3-10keV
1.02023	-5.9647	4.4905	3-10keV
1.02033	11.3824	9.5124	3-10keV
1.02042	7.6563	8.7573	3-10keV
1.02051	5.8823	7.8505	3-10keV
1.0206	-7.2575	4.5863	3-10keV
1.0207	10.8796	8.6291	3-10keV
1.02079	8.2953	8.7216	3-10keV
1.02088	5.2207	7.8648	3-10keV
1.02097	0.8435	6.9535	3-10keV
1.02107	7.8024	7.7555	3-10keV
1.02116	-4.6728	4.399	3-10keV
1.02125	-1.5957	5.7975	3-10keV
1.02134	1.4937	6.9277	3-10keV
1.02144	-4.1783	5.9343	3-10keV
1.02153	-0.9517	5.7562	3-10keV
1.02162	-4.0258	4.3499	3-10keV
1.02172	1.4935	6.9267	3-10keV
1.02181	-2.3823	7.1027	3-10keV
1.0219	2.1476	6.904	3-10keV
1.02199	-1.0965	7.0518	3-10keV
1.02209	4.7263	6.7768	3-10keV
1.02218	-8.3957	4.0071	3-10keV
1.02227	-6.1119	6.046	3-10keV
1.02236	-2.8868	5.8796	3-10keV
1.02246	4.5755	7.899	3-10keV
1.02255	5.377	6.7518	3-10keV
1.02264	-5.1683	3.7381	3-10keV
1.02273	8.7719	9.5931	3-10keV
1.02283	10.2356	8.6499	3-10keV
1.02292	8.29	8.7171	3-10keV
1.02301	-7.909	4.6257	3-10keV
1.0231	6.5217	7.8229	3-10keV
1.0232	28.8777	12.0189	3-10keV
1.02329	0.8429	6.9557	3-10keV
1.02338	-0.7974	4.1007	3-10keV
1.02347	2.1485	6.9109	3-10keV
1.02357	14.4922	10.2463	3-10keV
1.02366	-0.4549	7.0043	3-10keV
1.02375	0.6867	8.0445	3-10keV
1.02384	-10.4803	4.8021	3-10keV
1.02394	19.4842	10.8552	3-10keV
1.02403	-2.237	5.8315	3-10keV
1.02412	13.3143	9.4415	3-10keV
1.02422	2.1485	6.9051	3-10keV
1.02431	9.6118	8.6954	3-10keV
1.0244	6.3761	8.8135	3-10keV
1.02449	-5.9848	4.4958	3-10keV
1.02459	15.125	10.2296	3-10keV
1.02468	9.603	8.6864	3-10keV
1.02477	3.2875	7.9553	3-10keV
1.02486	-0.4451	7.0188	3-10keV
1.02496	6.3521	8.8033	3-10keV
1.02505	3.2829	7.954	3-10keV
1.02514	7.66	8.758	3-10keV
1.02523	0.3496	5.69	3-10keV
1.02533	-10.9951	4.2126	3-10keV
1.02542	0.848	6.9618	3-10keV
1.02551	0.1971	6.9895	3-10keV
1.0256	5.8805	7.8508	3-10keV
1.0257	8.3042	8.7295	3-10keV
1.02579	5.2125	7.8679	3-10keV
1.02588	1.4939	6.9381	3-10keV
1.02597	4.458	8.9044	3-10keV
1.02607	-3.0355	7.1469	3-10keV
1.02616	6.3663	8.8093	3-10keV
1.02625	37.5484	13.7288	3-10keV
1.02634	28.2835	12.0555	3-10keV
1.02644	19.6284	10.0713	3-10keV
1.02653	5.2256	7.8717	3-10keV
1.02662	17.0719	10.1687	3-10keV
1.02672	-9.6851	4.1095	3-10keV
1.02681	15.7528	10.1908	3-10keV
1.0269	-3.5352	5.9139	3-10keV
1.02699	-1.5963	5.8079	3-10keV
1.02709	4.9283	9.7404	3-10keV
1.02718	12.6907	9.4685	3-10keV
1.02727	29.3608	12.6536	3-10keV
1.02736	8.9502	8.7052	3-10keV
1.02746	8.2995	8.7239	3-10keV
1.02755	-5.4713	6.013	3-10keV
1.02764	0.8469	6.9659	3-10keV
1.02773	5.218	7.8724	3-10keV
1.02783	20.0552	11.6082	3-10keV
1.02792	6.3795	8.8235	3-10keV
1.02801	-0.9408	5.7739	3-10keV
1.0281	-5.9685	4.4948	3-10keV
1.0282	-1.104	7.0448	3-10keV
1.02829	23.3694	10.7439	3-10keV
1.02838	10.0996	9.5647	3-10keV
1.02847	2.7836	6.8671	3-10keV
1.02857	-1.8886	8.1517	3-10keV
1.02866	2.4955	8.9557	3-10keV
1.02875	1.352	8.0375	3-10keV
1.02884	-5.9728	4.4872	3-10keV
1.02894	-3.036	7.1411	3-10keV
1.02903	0.6978	8.061	3-10keV
1.02912	5.2282	7.8779	3-10keV
1.02922	-3.5337	5.9128	3-10keV
1.02931	19.0213	10.1109	3-10keV
1.0294	20.1618	10.8543	3-10keV
1.02949	1.9905	8.0028	3-10keV
1.02959	24.3961	12.1581	3-10keV
1.02968	23.248	11.4969	3-10keV
1.02977	5.0737	8.8515	3-10keV
1.02986	5.2196	7.8602	3-10keV
1.02996	20.794	10.8245	3-10keV
1.03005	10.252	8.666	3-10keV
1.03014	8.3183	8.744	3-10keV
1.03023	-2.9036	5.8714	3-10keV
1.03033	3.9252	7.9147	3-10keV
1.03042	6.2222	9.6951	3-10keV
1.03051	5.6981	8.8206	3-10keV
1.0306	16.3984	10.174	3-10keV
1.0307	-2.38	7.1096	3-10keV
1.03079	-5.471	6.0153	3-10keV
1.03088	-6.1101	6.0468	3-10keV
1.03097	20.7752	10.8169	3-10keV
1.03107	-4.0323	4.3505	3-10keV
1.03116	17.0548	10.1578	3-10keV
1.03125	19.5203	10.8725	3-10keV
1.03134	38.2035	13.7159	3-10keV
1.03144	10.6082	10.3811	3-10keV
1.03153	23.348	10.7362	3-10keV
1.03162	38.5749	14.2464	3-10keV
1.03172	13.9682	9.4242	3-10keV
1.03181	13.3535	9.4667	3-10keV
1.0319	5.0373	8.8444	3-10keV
1.03199	11.3752	9.5083	3-10keV
1.03209	23.2171	11.477	3-10keV
1.03218	23.8153	11.4453	3-10keV
1.03227	5.8667	7.8387	3-10keV
1.03236	15.7853	10.2093	3-10keV
1.03246	7.6465	8.7468	3-10keV
1.03255	0.194	6.9741	3-10keV
1.03264	23.7124	12.1534	3-10keV
1.03273	3.2975	7.9522	3-10keV
1.03283	6.376	8.8173	3-10keV
1.03292	25.6812	12.1161	3-10keV
1.03301	23.07	12.1749	3-10keV
1.0331	-4.1783	5.9474	3-10keV
1.0332	6.3655	8.8033	3-10keV
1.03329	6.5137	7.8207	3-10keV
1.03338	12.6877	9.4852	3-10keV
1.03347	20.7999	10.8307	3-10keV
1.03357	2.14	6.9078	3-10keV
1.03366	63.0422	16.9265	3-10keV
1.03375	22.6003	11.5145	3-10keV
1.03384	25.7037	12.1333	3-10keV
1.03394	37.4782	14.3458	3-10keV
1.03403	29.4435	12.6944	3-10keV
1.03412	20.114	10.8297	3-10keV
1.03422	18.3514	10.1189	3-10keV
1.03431	3.2922	7.9613	3-10keV
1.0344	6.2115	9.6907	3-10keV
1.03449	5.0573	8.8375	3-10keV
1.03459	-9.2157	4.7269	3-10keV
1.03468	-3.533	5.9167	3-10keV
1.03477	0.8463	6.96	3-10keV
1.03486	-1.4424	4.1538	3-10keV
1.03496	7.039	8.7944	3-10keV
1.03505	-4.6881	4.3989	3-10keV
1.03514	-6.6159	4.5375	3-10keV
1.03523	15.1205	10.2242	3-10keV
1.03533	-4.0297	4.3509	3-10keV
1.03542	2.786	6.8652	3-10keV
1.03551	-0.4481	7.0123	3-10keV
1.0356	4.4389	8.8835	3-10keV
1.0357	9.6141	8.6922	3-10keV
1.03579	12.6776	9.4695	3-10keV
1.03588	-3.381	4.2968	3-10keV
1.03597	0.9944	5.6558	3-10keV
1.03607	14.7813	8.4952	3-10keV
1.03616	4.5724	7.8945	3-10keV
1.03625	10.2459	8.6599	3-10keV
1.03634	7.6611	8.7581	3-10keV
1.03644	4.7293	6.7784	3-10keV
1.03653	0.2007	6.9922	3-10keV
1.03662	0.348	5.6977	3-10keV
1.03672	-4.6752	4.3951	3-10keV
1.03681	2.7845	6.8639	3-10keV
1.0369	-1.7392	7.0758	3-10keV
1.03699	9.7201	7.6636	3-10keV
1.03709	2.1153	6.8797	3-10keV
1.03718	-5.9704	4.4905	3-10keV
1.03727	-0.9425	5.7666	3-10keV
1.03736	8.2965	8.7236	3-10keV
1.03746	3.5769	5.5007	3-10keV
1.03755	-0.9434	5.7609	3-10keV
1.03764	7.0052	8.7701	3-10keV
1.03773	3.9324	7.9266	3-10keV
1.03783	6.6878	6.6975	3-10keV
1.03792	7.1586	7.7857	3-10keV
1.03801	-5.3253	4.444	3-10keV
1.0381	6.6519	6.6745	3-10keV
1.0382	8.9533	8.7075	3-10keV
1.03829	-2.2385	5.8413	3-10keV
1.03838	-1.5846	5.8038	3-10keV
1.03847	6.0255	6.7204	3-10keV
1.03857	3.2916	7.9552	3-10keV
1.03866	1.493	6.9319	3-10keV
1.03875	-2.0853	4.206	3-10keV
1.03884	0.3477	5.6931	3-10keV
1.03894	-7.2614	4.5863	3-10keV
1.03903	8.1765	9.6406	3-10keV
1.03912	3.4372	6.8473	3-10keV
1.03922	3.4239	6.8296	3-10keV
1.03931	5.39	6.7536	3-10keV
1.0394	-0.4457	7.026	3-10keV
1.03949	2.7872	6.873	3-10keV
1.03959	-1.0969	7.0454	3-10keV
1.03968	2.7797	6.8645	3-10keV
1.03977	0.3495	5.7037	3-10keV
1.03986	2.1437	6.9136	3-10keV
1.03996	5.2208	7.868	3-10keV
1.04005	8.4515	7.7309	3-10keV
1.04014	7.161	7.7857	3-10keV
1.04023	7.5135	9.6498	3-10keV
1.04033	-4.9698	7.2176	3-10keV
1.04042	7.8034	7.7555	3-10keV
1.04051	7.7976	7.7525	3-10keV
1.0406	-0.94	5.7583	3-10keV
1.0407	10.8918	8.6358	3-10keV
1.04079	-1.5849	5.7977	3-10keV
1.04088	4.0722	6.8005	3-10keV
1.04097	5.2181	7.864	3-10keV
1.04107	0.348	5.6902	3-10keV
1.04116	-4.0125	4.3459	3-10keV
1.04125	2.2781	5.5665	3-10keV
1.04134	1.4885	6.9172	3-10keV
1.04144	8.2955	8.7219	3-10keV
1.04153	0.3588	5.6991	3-10keV
1.04162	-9.359	6.2265	3-10keV
1.04172	-4.8282	5.9813	3-10keV
1.04181	11.4985	8.5835	3-10keV
1.0419	-7.0889	3.8991	3-10keV
1.04199	5.3799	6.752	3-10keV
1.04209	-1.7197	7.0744	3-10keV
1.04218	-0.2921	5.7248	3-10keV
1.04227	1.6394	5.6206	3-10keV
1.04236	4.0776	6.8067	3-10keV
1.04246	-8.5493	4.6725	3-10keV
1.04255	-7.7552	3.9556	3-10keV
1.04264	-2.7335	4.2553	3-10keV
1.04273	-9.0585	4.0615	3-10keV
1.04283	3.2806	7.9521	3-10keV
1.04292	-10.9936	4.2124	3-10keV
1.04301	4.4285	8.8779	3-10keV
1.0431	-4.676	4.3986	3-10keV
1.0432	0.8455	6.9576	3-10keV
1.04329	1.4964	6.9353	3-10keV
1.04338	5.3862	6.7565	3-10keV
1.04347	-2.8821	5.87	3-10keV
1.04357	4.7201	6.7713	3-10keV
1.04366	4.7222	6.7737	3-10keV
1.04375	16.4031	10.1786	3-10keV
1.04384	18.8273	10.8701	3-10keV
1.04394	4.0812	6.8085	3-10keV
1.04403	5.8738	7.8499	3-10keV
1.04412	1.4927	6.9256	3-10keV
1.04422	0.2152	7.0009	3-10keV
1.04431	1.5022	6.9415	3-10keV
1.0444	16.5566	9.3387	3-10keV
1.04449	-3.0235	7.1289	3-10keV
1.04459	0.1854	6.9771	3-10keV
1.04468	-5.307	4.4422	3-10keV
1.04477	2.6344	7.9607	3-10keV
1.04486	-8.4006	4.0079	3-10keV
1.04496	-5.8218	3.7948	3-10keV
1.04505	-2.8864	5.866	3-10keV
1.04514	7.8025	7.7539	3-10keV
1.04523	-0.2971	5.7272	3-10keV
1.04533	2.1359	6.8927	3-10keV
1.04542	-4.0327	4.3477	3-10keV
1.04551	-4.6802	4.4008	3-10keV
1.0456	10.4006	7.6583	3-10keV
1.0457	-0.299	5.7321	3-10keV
1.04579	10.7379	9.5359	3-10keV
1.04588	-3.5309	5.8983	3-10keV
1.04597	2.2835	5.572	3-10keV
1.04607	12.0183	9.4868	3-10keV
1.04616	-4.8252	5.9806	3-10keV
1.04625	13.9633	9.4211	3-10keV
1.04634	9.5876	8.6738	3-10keV
1.04644	-0.951	5.7597	3-10keV
1.04653	2.291	5.5839	3-10keV
1.04662	-6.7823	6.0844	3-10keV
1.04672	1.4979	6.9406	3-10keV
1.04681	-5.3281	4.4468	3-10keV
1.0469	-4.8299	5.9871	3-10keV
1.04699	13.9893	9.4389	3-10keV
1.04709	21.5796	10.0145	3-10keV
1.04718	14.7497	8.4775	3-10keV
1.04727	5.3651	6.7406	3-10keV
1.04736	-0.9373	5.7743	3-10keV
1.04746	-1.4362	4.1643	3-10keV
1.04755	-5.47	6.0214	3-10keV
1.04764	-7.9005	4.6241	3-10keV
1.04773	5.8583	7.8345	3-10keV
1.04783	-8.4059	4.0087	3-10keV
1.04792	-1.7421	7.085	3-10keV
1.04801	4.5762	7.9003	3-10keV
1.0481	-2.8787	5.8733	3-10keV
1.0482	1.4874	6.9258	3-10keV
1.04829	10.8521	8.6129	3-10keV
1.04838	0.3494	5.6797	3-10keV
1.04847	4.7264	6.7732	3-10keV
1.04857	4.5716	7.8967	3-10keV
1.04866	-1.7424	7.0854	3-10keV
1.04875	-0.2985	5.7339	3-10keV
1.04884	-5.9644	4.4923	3-10keV
1.04894	3.4287	6.8312	3-10keV
1.04903	10.8854	8.6316	3-10keV
1.04912	0.8388	6.9451	3-10keV
1.04922	-1.5907	5.7966	3-10keV
1.04931	-10.3377	4.161	3-10keV
1.0494	14.1174	8.5101	3-10keV
1.04949	1.4943	6.9365	3-10keV
1.04959	-6.1214	6.0539	3-10keV
1.04968	-0.9445	5.7656	3-10keV
1.04977	4.0767	6.8055	3-10keV
1.04986	3.4281	6.8342	3-10keV
1.04996	-5.9589	4.4816	3-10keV
1.05005	-9.186	4.7082	3-10keV
1.05014	-4.1733	5.9393	3-10keV
1.05023	2.7791	6.8566	3-10keV
1.05033	13.9805	9.4275	3-10keV
1.05042	-5.3235	4.447	3-10keV
1.05051	7.8182	7.7702	3-10keV
1.0506	-15.5405	4.5494	3-10keV
1.0507	-9.8505	4.7691	3-10keV
1.05079	-1.5919	5.8049	3-10keV
1.05088	-4.5289	3.683	3-10keV
1.05097	0.849	6.9668	3-10keV
1.05107	-7.2722	4.5921	3-10keV
1.05116	0.8397	6.9616	3-10keV
1.05125	-5.3144	4.4434	3-10keV
1.05134	6.5092	7.8136	3-10keV
1.05144	0.1931	6.9829	3-10keV
1.05153	4.5724	7.891	3-10keV
1.05162	14.1347	8.519	3-10keV
1.05172	2.2967	5.5887	3-10keV
1.05181	1.4879	6.9234	3-10keV
1.0519	-5.3177	4.4468	3-10keV
1.05199	-9.2016	4.7162	3-10keV
1.05209	-4.8217	5.9781	3-10keV
1.05218	3.4325	6.8315	3-10keV
1.05227	-5.9534	4.486	3-10keV
1.05236	-1.0936	7.0364	3-10keV
1.05246	2.1429	6.8937	3-10keV
1.05255	6.6616	6.681	3-10keV
1.05264	-1.5907	5.8026	3-10keV
1.05273	9.1066	7.7127	3-10keV
1.05283	2.9227	5.5365	3-10keV
1.05292	15.2544	9.3768	3-10keV
1.05301	2.2877	5.5831	3-10keV
1.0531	-4.1837	5.9464	3-10keV
1.0532	-5.9725	4.4953	3-10keV
1.05329	-10.3652	4.1653	3-10keV
1.05338	-12.304	4.313	3-10keV
1.05347	8.4655	7.7438	3-10keV
1.05357	7.0185	8.7806	3-10keV
1.05366	-2.2331	5.8272	3-10keV
1.05375	-3.5328	5.904	3-10keV
1.05384	-4.8223	5.9787	3-10keV
1.05394	9.5885	8.6758	3-10keV
1.05403	-3.5317	5.9075	3-10keV
1.05412	1.3403	8.0254	3-10keV
1.05422	6.663	6.683	3-10keV
1.05431	1.3426	8.0334	3-10keV
1.0544	9.6086	8.6943	3-10keV
1.05449	6.5112	7.8153	3-10keV
1.05459	11.3761	9.5064	3-10keV
1.05468	10.8902	8.6316	3-10keV
1.05477	3.9283	7.9202	3-10keV
1.05486	10.8991	8.641	3-10keV
1.05496	-6.6127	4.5453	3-10keV
1.05505	0.1957	6.9818	3-10keV
1.05514	16.3612	10.1528	3-10keV
1.05523	11.3299	9.4851	3-10keV
1.05533	2.7831	6.8656	3-10keV
1.05542	-5.9687	4.4932	3-10keV
1.05551	-7.259	4.5801	3-10keV
1.0556	10.2395	8.6549	3-10keV
1.0557	0.1908	6.9805	3-10keV
1.05579	-2.8945	5.8656	3-10keV
1.05588	12.8367	8.5683	3-10keV
1.05597	-4.0275	4.35	3-10keV
1.05607	5.2219	7.8686	3-10keV
1.05616	-2.8836	5.8838	3-10keV
1.05625	0.349	5.6974	3-10keV
1.05634	-5.9747	4.4918	3-10keV
1.05644	0.3503	5.6943	3-10keV
1.05653	-7.2582	4.5805	3-10keV
1.05662	-4.0373	4.3536	3-10keV
1.05672	0.2013	7.0015	3-10keV
1.05681	-0.2951	5.7387	3-10keV
1.0569	7.1651	7.7944	3-10keV
1.05699	-6.6146	4.5433	3-10keV
1.05709	3.4308	6.8396	3-10keV
1.05718	7.8127	7.7603	3-10keV
1.05727	-2.3759	7.1024	3-10keV
1.05736	1.4882	6.9189	3-10keV
1.05746	0.361	5.7002	3-10keV
1.05755	-3.5348	5.9149	3-10keV
1.05764	1.9913	7.9959	3-10keV
1.05773	-7.7472	3.9543	3-10keV
1.05783	0.8345	6.9578	3-10keV
1.05792	-7.9054	4.637	3-10keV
1.05801	16.5338	9.3243	3-10keV
1.10089	-1.6452	5.3516	3-10keV
1.10099	-6.8428	3.6043	3-10keV
1.10108	2.9239	6.3099	3-10keV
1.10117	0.0543	5.2555	3-10keV
1.10126	-0.5097	5.2916	3-10keV
1.10136	5.7913	6.1921	3-10keV
1.10145	-2.8226	3.9371	3-10keV
1.10154	6.3656	6.1688	3-10keV
1.10163	12.7177	8.7167	3-10keV
1.10173	1.2014	5.1959	3-10keV
1.10182	11.5271	7.9068	3-10keV
1.10191	1.2011	5.1975	3-10keV
1.102	4.6463	6.2372	3-10keV
1.1021	-3.3567	5.4381	3-10keV
1.10219	-4.4723	6.6393	3-10keV
1.10228	1.2021	5.2011	3-10keV
1.10237	6.9531	7.1695	3-10keV
1.10247	3.5096	6.2932	3-10keV
1.10256	-7.41	3.6487	3-10keV
1.10265	-1.0818	5.3163	3-10keV
1.10275	6.3588	6.1598	3-10keV
1.10284	-1.0505	6.491	3-10keV
1.10293	0.089	6.4443	3-10keV
1.10302	14.426	8.6554	3-10keV
1.10312	6.9916	8.0835	3-10keV
1.10321	-1.681	3.8524	3-10keV
1.1033	2.9382	6.317	3-10keV
1.10339	1.2017	5.21	3-10keV
1.10349	4.0568	6.2553	3-10keV
1.10358	-5.1263	3.4654	3-10keV
1.10367	-1.0826	5.3291	3-10keV
1.10376	0.6305	5.2329	3-10keV
1.10386	-1.1088	3.808	3-10keV
1.10395	5.8264	7.2159	3-10keV
1.10404	2.3591	6.3295	3-10keV
1.10413	0.6255	5.2331	3-10keV
1.10423	0.6604	6.43	3-10keV
1.10432	-0.5143	5.2873	3-10keV
1.10441	7.5235	7.1494	3-10keV
1.1045	5.2174	6.2128	3-10keV
1.1046	-4.4992	5.506	3-10keV
1.10469	4.1126	7.2938	3-10keV
1.10478	4.6531	6.2392	3-10keV
1.10487	-5.123	3.4648	3-10keV
1.10497	-8.5442	3.7357	3-10keV
1.10506	-0.4804	6.4676	3-10keV
1.10515	-2.8157	3.9313	3-10keV
1.10525	4.0738	6.2586	3-10keV
1.10534	-2.2471	3.8838	3-10keV
1.10543	-7.9617	3.6901	3-10keV
1.10552	4.6836	7.2635	3-10keV
1.10562	8.6655	7.1056	3-10keV
1.10571	-1.1089	3.8042	3-10keV
1.1058	-3.96	4.02	3-10keV
1.10589	0.0605	5.2681	3-10keV
1.10599	0.6234	5.2242	3-10keV
1.10608	-5.0918	4.089	3-10keV
1.10617	6.3507	6.1545	3-10keV
1.10626	6.9549	7.1711	3-10keV
1.10636	4.639	6.2299	3-10keV
1.10645	-2.252	3.8845	3-10keV
1.10654	-2.8175	3.9276	3-10keV
1.10663	-3.952	4.0068	3-10keV
1.10673	-2.791	5.4092	3-10keV
1.10682	-8.5202	4.3285	3-10keV
1.10691	0.638	5.2337	3-10keV
1.107	-3.3479	5.4445	3-10keV
1.1071	8.1009	7.1298	3-10keV
1.10719	0.0573	5.254	3-10keV
1.10728	-5.6529	4.1267	3-10keV
1.10737	-5.6572	4.1283	3-10keV
1.10747	2.3664	6.3354	3-10keV
1.10756	3.5135	6.2936	3-10keV
1.10765	-11.3877	3.9462	3-10keV
1.10775	-6.27	3.5585	3-10keV
1.10784	6.962	7.1794	3-10keV
1.10793	6.3629	6.1602	3-10keV
1.10802	-0.5113	5.2876	3-10keV
1.10812	0.0256	3.7192	3-10keV
1.10821	0.0844	6.4436	3-10keV
1.1083	3.5124	6.2949	3-10keV
1.10839	-3.3889	3.9684	3-10keV
1.10849	-1.657	5.3538	3-10keV
1.10858	4.0836	6.2738	3-10keV
1.10867	-1.682	3.8592	3-10keV
1.10876	-3.3943	3.9758	3-10keV
1.10886	12.1497	8.7343	3-10keV
1.10895	-9.6889	3.8224	3-10keV
1.10904	8.6786	7.1147	3-10keV
1.10913	-2.8158	3.9377	3-10keV
1.10923	3.5028	6.2829	3-10keV
1.10932	10.3922	7.9524	3-10keV
1.10941	-7.9458	4.2885	3-10keV
1.1095	1.1982	5.2014	3-10keV
1.1096	3.4763	5.0698	3-10keV
1.10969	-2.2451	3.885	3-10keV
1.10978	11.0047	8.7672	3-10keV
1.10987	12.728	8.7206	3-10keV
1.10997	9.8343	7.9789	3-10keV
1.11006	4.66	6.2476	3-10keV
1.11015	-0.511	5.2995	3-10keV
1.11025	-2.8082	3.9358	3-10keV
1.11034	2.3631	6.3329	3-10keV
1.11043	6.9517	7.1706	3-10keV
1.11052	-5.6701	4.1332	3-10keV
1.11062	1.769	5.1688	3-10keV
1.11071	-2.7828	5.4055	3-10keV
1.1108	1.7929	6.3474	3-10keV
1.11089	-1.0761	5.3265	3-10keV
1.11099	3.5097	6.2943	3-10keV
1.11108	4.6813	7.267	3-10keV
1.11117	-1.6166	6.5368	3-10keV
1.11126	-7.4144	3.6493	3-10keV
1.11136	6.9598	7.1758	3-10keV
1.11145	5.2103	6.2043	3-10keV
1.11154	-7.9648	3.6906	3-10keV
1.11163	3.5382	7.3147	3-10keV
1.11173	1.7719	5.1768	3-10keV
1.11182	-2.2207	5.3862	3-10keV
1.11191	0.0275	3.7179	3-10keV
1.112	8.6969	8.0216	3-10keV
1.1121	14.982	8.63	3-10keV
1.11219	17.8389	9.299	3-10keV
1.11228	16.1225	8.5975	3-10keV
1.11237	8.6599	7.1046	3-10keV
1.11247	-5.6355	5.559	3-10keV
1.11256	4.6855	7.2716	3-10keV
1.11265	4.6302	6.229	3-10keV
1.11275	5.7806	6.1788	3-10keV
1.11284	-4.5241	4.0522	3-10keV
1.11293	-3.3841	3.9661	3-10keV
1.11302	1.7998	6.366	3-10keV
1.11312	-9.0958	4.3689	3-10keV
1.11321	12.6767	7.8693	3-10keV
1.1133	-9.6649	3.8189	3-10keV
1.11339	0.0703	5.2666	3-10keV
1.11349	-7.9794	3.6928	3-10keV
1.11358	6.9592	7.1758	3-10keV
1.11367	-1.0534	6.4835	3-10keV
1.11376	-1.6828	3.8565	3-10keV
1.11386	1.795	6.3724	3-10keV
1.11395	-2.7898	5.4105	3-10keV
1.11404	-0.5376	3.7612	3-10keV
1.11413	-6.819	4.2091	3-10keV
1.11423	8.6679	7.1085	3-10keV
1.11432	-0.4985	5.2908	3-10keV
1.11441	-1.6549	5.3494	3-10keV
1.1145	5.2187	6.2115	3-10keV
1.1146	7.507	6.1137	3-10keV
1.11469	0.0523	5.2509	3-10keV
1.11478	-4.5579	3.4184	3-10keV
1.11487	1.1996	5.2007	3-10keV
1.11497	3.5038	6.2861	3-10keV
1.11506	-3.9204	5.4682	3-10keV
1.11515	6.9207	6.1295	3-10keV
1.11525	-1.0814	5.328	3-10keV
1.11534	-3.3949	3.9812	3-10keV
1.11543	-5.0957	4.1005	3-10keV
1.11552	7.5261	7.1581	3-10keV
1.11562	-0.4909	6.4674	3-10keV
1.11571	-0.5081	5.2979	3-10keV
1.1158	6.3943	7.2005	3-10keV
1.11589	2.9121	5.1098	3-10keV
1.11599	0.0623	5.2602	3-10keV
1.11608	0.058	5.2582	3-10keV
1.11617	-3.3898	3.9777	3-10keV
1.11626	11.5736	8.7481	3-10keV
1.11636	-6.2342	4.1696	3-10keV
1.11645	19.581	9.2662	3-10keV
1.11654	-2.8225	3.9401	3-10keV
1.11663	-1.0834	5.3283	3-10keV
1.11673	-0.5086	5.2924	3-10keV
1.11682	-5.6663	4.1341	3-10keV
1.11691	-9.6716	3.8198	3-10keV
1.117	0.6244	5.2276	3-10keV
1.1171	8.7056	8.0299	3-10keV
1.11719	-3.9626	4.017	3-10keV
1.11728	2.3349	5.1319	3-10keV
1.11737	3.5022	6.2782	3-10keV
1.11747	0.6287	5.2196	3-10keV
1.11756	4.6424	6.2308	3-10keV
1.11765	2.3686	6.3416	3-10keV
1.11775	8.6714	7.1095	3-10keV
1.11784	-9.6871	3.8222	3-10keV
1.11793	0.0526	5.2645	3-10keV
1.11802	8.7083	8.0318	3-10keV
1.11812	-9.6992	3.824	3-10keV
1.11821	-9.1229	3.7803	3-10keV
1.1183	-4.5605	3.4189	3-10keV
1.11839	-3.9644	4.0209	3-10keV
1.11849	4.6588	6.2532	3-10keV
1.11858	4.649	6.2457	3-10keV
1.11867	0.0623	5.2671	3-10keV
1.11876	0.0328	3.7242	3-10keV
1.11886	-4.494	5.4981	3-10keV
1.11895	-3.3861	3.971	3-10keV
1.11904	-0.5126	5.2771	3-10keV
1.11913	2.3813	6.3465	3-10keV
1.11923	-1.6492	5.353	3-10keV
1.11932	7.5335	7.1554	3-10keV
1.11941	-3.9988	3.3724	3-10keV
1.1195	2.9418	6.3165	3-10keV
1.1196	-4.5188	4.0431	3-10keV
1.11969	5.2325	7.2214	3-10keV
1.11978	-3.9603	4.0238	3-10keV
1.11987	1.1882	5.1931	3-10keV
1.11997	-2.8225	3.9281	3-10keV
1.12006	-7.4131	3.6491	3-10keV
1.12015	1.2035	5.2082	3-10keV
1.12025	0.0546	5.2617	3-10keV
1.12034	6.3868	7.1923	3-10keV
1.12043	0.0882	6.4391	3-10keV
1.12052	-2.2177	5.3817	3-10keV
1.12062	1.1985	5.1885	3-10keV
1.12071	5.1834	6.1925	3-10keV
1.1208	12.1331	7.9128	3-10keV
1.12089	-1.6754	3.8584	3-10keV
1.12099	8.1338	8.0477	3-10keV
1.12108	21.3424	9.9456	3-10keV
1.12117	6.9344	6.1405	3-10keV
1.12126	1.2332	6.4035	3-10keV
1.12136	8.6999	8.0232	3-10keV
1.12145	-5.0673	5.5305	3-10keV
1.12154	9.2394	7.0854	3-10keV
1.12163	3.5101	6.2926	3-10keV
1.12173	-7.3836	4.2597	3-10keV
1.12182	-6.8376	3.6035	3-10keV
1.12191	-2.8166	3.929	3-10keV
1.122	2.9344	6.3131	3-10keV
1.1221	-9.7001	3.8241	3-10keV
1.12219	-5.6759	4.1369	3-10keV
1.12228	5.2215	6.2177	3-10keV
1.12237	1.8034	6.3705	3-10keV
1.12247	-1.6791	3.8533	3-10keV
1.12256	2.9207	5.12	3-10keV
1.12265	5.7787	6.1824	3-10keV
1.12275	-1.6822	3.8466	3-10keV
1.12284	-2.2434	3.8922	3-10keV
1.12293	16.1468	9.3583	3-10keV
1.12302	4.096	6.2757	3-10keV
1.12312	1.1996	5.2056	3-10keV
1.12321	-7.9529	4.2881	3-10keV
1.1233	0.0888	6.4401	3-10keV
1.12339	-3.9589	4.0181	3-10keV
1.12349	1.7658	5.1675	3-10keV
1.12358	2.3385	5.137	3-10keV
1.12367	0.6589	6.4199	3-10keV
1.12376	1.7996	6.3692	3-10keV
1.12386	-5.1003	4.0953	3-10keV
1.12395	-1.0833	5.3183	3-10keV
1.12404	-7.4025	3.6475	3-10keV
1.12413	0.0524	5.2596	3-10keV
1.12423	-3.363	5.4488	3-10keV
1.12432	-0.5155	5.2892	3-10keV
1.12441	1.7748	5.1638	3-10keV
1.1245	-1.6749	3.8555	3-10keV
1.1246	3.518	6.3066	3-10keV
1.12469	4.6398	6.2342	3-10keV
1.12478	1.7774	5.1807	3-10keV
1.12487	-3.9703	4.0268	3-10keV
1.12497	4.6556	6.2527	3-10keV
1.12506	4.6494	6.2412	3-10keV
1.12515	15.6094	9.3975	3-10keV
1.12525	0.6245	5.2258	3-10keV
1.12534	-7.3739	4.2496	3-10keV
1.12543	-4.5257	4.0504	3-10keV
1.12552	-1.0772	5.33	3-10keV
1.12562	10.4104	7.9645	3-10keV
1.12571	2.3362	5.1332	3-10keV
1.1258	-3.956	4.0229	3-10keV
1.12589	0.645	6.4146	3-10keV
1.12599	-5.6659	4.1342	3-10keV
1.12608	-2.2205	5.387	3-10keV
1.12617	0.6939	7.4258	3-10keV
1.12626	0.6251	5.2232	3-10keV
1.12636	6.955	7.1705	3-10keV
1.12645	-9.6885	3.8224	3-10keV
1.12654	5.7859	6.1838	3-10keV
1.12663	8.6615	7.1015	3-10keV
1.12673	8.6664	7.1072	3-10keV
1.12682	-7.9395	4.295	3-10keV
1.12691	0.6292	5.2239	3-10keV
1.127	1.1979	5.1957	3-10keV
1.1271	0.5993	3.6745	3-10keV
1.12719	13.8537	8.6741	3-10keV
1.12728	3.5144	6.2979	3-10keV
1.12737	-3.4228	3.3229	3-10keV
1.12747	-0.5009	5.2943	3-10keV
1.12756	2.9319	6.3066	3-10keV
1.12765	3.5056	6.2849	3-10keV
1.12775	-7.9863	3.6939	3-10keV
1.12784	-3.9622	4.0166	3-10keV
1.12793	0.631	5.2332	3-10keV
1.12802	9.808	7.0616	3-10keV
1.12812	4.0535	5.0483	3-10keV
1.12821	-9.1402	3.7829	3-10keV
1.1283	3.507	6.2923	3-10keV
1.12839	-4.5282	4.0571	3-10keV
1.12849	-6.2401	4.173	3-10keV
1.12858	4.0786	6.2665	3-10keV
1.12867	1.2318	6.3954	3-10keV
1.12876	-2.8189	3.9327	3-10keV
1.12886	12.6888	7.8804	3-10keV
1.12895	-3.3617	5.4467	3-10keV
1.12904	0.6287	5.2326	3-10keV
1.12913	0.6245	5.2271	3-10keV
1.12923	7.0034	8.0954	3-10keV
1.12932	2.3732	6.3533	3-10keV
1.12941	-1.111	3.8139	3-10keV
1.1295	1.2332	6.4079	3-10keV
1.1296	-7.3791	4.2576	3-10keV
1.12969	-9.125	3.7806	3-10keV
1.12978	-3.3657	5.441	3-10keV
1.12987	-1.0532	6.4925	3-10keV
1.12997	-4.5614	3.419	3-10keV
1.13006	-9.6648	4.4	3-10keV
1.13015	10.4028	7.9579	3-10keV
1.13025	-3.9595	4.0189	3-10keV
1.13034	5.7787	6.1753	3-10keV
1.13043	0.6394	5.2298	3-10keV
1.13052	-9.6851	3.8219	3-10keV
1.13062	-5.1054	4.0945	3-10keV
1.13071	-1.6518	5.3528	3-10keV
1.1308	6.3978	7.2059	3-10keV
1.13089	-6.2418	4.1776	3-10keV
1.13099	-4.5253	4.0558	3-10keV
1.13108	-3.4003	3.9732	3-10keV
1.13117	10.9585	7.9331	3-10keV
1.13126	12.7056	8.7061	3-10keV
1.13136	-3.9859	3.3703	3-10keV
1.13145	-2.1985	6.542	3-10keV
1.13154	0.0587	5.2651	3-10keV
1.13163	-2.2523	3.8939	3-10keV
1.13173	2.9383	6.32	3-10keV
1.13182	9.3016	8.8318	3-10keV
1.13191	0.6742	6.4261	3-10keV
1.132	5.2196	6.2125	3-10keV
1.1321	3.4789	5.0738	3-10keV
1.13219	1.8034	6.3722	3-10keV
1.13228	4.0695	6.2518	3-10keV
1.13237	-3.3523	5.4324	3-10keV
1.13247	4.6468	6.2339	3-10keV
1.13256	3.5078	6.2873	3-10keV
1.13265	8.6698	7.1072	3-10keV
1.13275	4.6752	7.2698	3-10keV
1.13284	6.9374	7.1595	3-10keV
1.13293	-2.2147	5.3844	3-10keV
1.13302	-6.8343	3.6029	3-10keV
1.13312	-3.9847	3.37	3-10keV
1.13321	-6.2356	4.1759	3-10keV
1.1333	-1.6249	6.5322	3-10keV
1.13339	18.4803	9.3195	3-10keV
1.13349	1.7726	5.1766	3-10keV
1.13358	2.946	6.3233	3-10keV
1.13367	-1.1106	3.8081	3-10keV
1.13376	4.6546	6.236	3-10keV
1.13386	-1.6382	5.3555	3-10keV
1.13395	6.9311	6.1378	3-10keV
1.13404	-3.3594	5.4293	3-10keV
1.13413	7.547	8.0516	3-10keV
1.13423	0.6283	5.2296	3-10keV
1.13432	-5.0904	4.0947	3-10keV
1.13441	0.637	5.2377	3-10keV
1.1345	1.7717	5.1706	3-10keV
1.1346	-2.8178	3.9308	3-10keV
1.13469	-5.095	4.0923	3-10keV
1.13478	4.6382	6.2356	3-10keV
1.13487	1.236	6.4051	3-10keV
1.13497	5.7938	6.1935	3-10keV
1.13506	-2.8233	3.9287	3-10keV
1.13515	3.5581	7.3222	3-10keV
1.13525	2.9407	6.3227	3-10keV
1.13534	6.4042	7.2087	3-10keV
1.13543	9.8657	7.9962	3-10keV
1.13552	-9.1261	3.7808	3-10keV
1.13562	3.5238	6.2976	3-10keV
1.13571	4.0823	6.2664	3-10keV
1.1358	-2.25	3.8884	3-10keV
1.13589	1.7992	6.3617	3-10keV
1.13599	-6.2739	3.5591	3-10keV
1.13608	2.9399	6.3191	3-10keV
1.13617	5.2102	6.2067	3-10keV
1.13626	-8.5218	4.3229	3-10keV
1.13636	5.2249	6.2169	3-10keV
1.13645	8.6704	7.1043	3-10keV
1.13654	11.5436	7.9196	3-10keV
1.13663	2.9213	6.3056	3-10keV
1.13673	-3.9271	5.4897	3-10keV
1.13682	-9.1365	3.7823	3-10keV
1.13691	12.1344	7.9105	3-10keV
1.137	0.66	6.4257	3-10keV
1.1371	5.8137	7.2192	3-10keV
1.13719	3.4766	5.0708	3-10keV
1.13728	17.857	8.5492	3-10keV
1.13737	1.8016	6.3764	3-10keV
1.13747	1.2312	6.4011	3-10keV
1.13756	0.0607	5.2623	3-10keV
1.13765	-2.8187	3.9344	3-10keV
1.13775	-3.3977	3.9768	3-10keV
1.13784	-2.2546	3.8985	3-10keV
1.13793	1.2024	5.2069	3-10keV
1.13802	-3.3898	3.9779	3-10keV
1.13812	-2.2231	5.3863	3-10keV
1.13821	2.9434	6.326	3-10keV
1.1383	-2.2247	5.3881	3-10keV
1.13839	5.8033	6.2051	3-10keV
1.13849	11.5835	8.7593	3-10keV
1.13858	-2.7918	5.4141	3-10keV
1.13867	-7.978	3.6926	3-10keV
1.13876	-2.2234	5.3868	3-10keV
1.13886	0.6153	5.2237	3-10keV
1.13895	6.9618	7.1792	3-10keV
1.13904	-1.6441	5.3598	3-10keV
1.13913	13.2431	7.8511	3-10keV
1.13923	4.647	6.2362	3-10keV
1.13932	-6.8066	4.2113	3-10keV
1.13941	4.1181	7.3019	3-10keV
1.1395	0.0537	5.2682	3-10keV
1.1396	2.3302	5.1437	3-10keV
1.14117	0.4284	3.1329	3-10keV
1.14126	0.2294	2.4328	3-10keV
1.14136	3.1161	2.6514	3-10keV
1.14145	-2.239	2.5362	3-10keV
1.14154	-4.1009	2.262	3-10keV
1.14163	1.8846	2.9956	3-10keV
1.14173	7.4628	3.7156	3-10keV
1.14182	-1.012	2.1167	3-10keV
1.14191	4.9888	3.176	3-10keV
1.142	0.6463	2.5894	3-10keV
1.1421	-1.822	2.8399	3-10keV
1.14219	0.2311	2.6015	3-10keV
1.14228	2.7127	3.1087	3-10keV
1.14237	-0.795	2.6425	3-10keV
1.14247	-1.8302	2.3417	3-10keV
1.14256	1.8876	2.9962	3-10keV
1.14265	2.9161	3.0987	3-10keV
1.14275	3.1254	3.2273	3-10keV
1.14284	3.3356	3.0909	3-10keV
1.14293	1.8806	2.6983	3-10keV
1.14302	1.2626	2.5629	3-10keV
1.14312	0.4414	2.902	3-10keV
1.14321	1.4675	2.7142	3-10keV
1.1433	-1.0072	2.3056	3-10keV
1.14339	2.9262	3.1063	3-10keV
1.14349	1.2637	2.5654	3-10keV
1.14358	0.4429	2.7586	3-10keV
1.14367	2.0935	2.9921	3-10keV
1.14376	-3.0664	2.2111	3-10keV
1.14386	3.5395	3.2178	3-10keV
1.14395	-0.3798	2.7848	3-10keV
1.14404	-1.2115	2.3157	3-10keV
1.14413	-0.188	2.0725	3-10keV
1.14423	0.2346	2.6013	3-10keV
1.14432	0.2338	2.601	3-10keV
1.14441	0.8516	2.5751	3-10keV
1.1445	1.8899	2.8514	3-10keV
1.1446	-3.0653	2.3984	3-10keV
1.14469	-1.8317	2.339	3-10keV
1.14478	2.2922	2.5197	3-10keV
1.14487	1.271	2.8799	3-10keV
1.14497	2.5144	3.122	3-10keV
1.14506	-0.9956	2.9588	3-10keV
1.14515	0.8614	3.0359	3-10keV
1.14525	-1.2123	2.3221	3-10keV
1.14534	1.2716	3.0244	3-10keV
1.14543	-1.4149	2.6707	3-10keV
1.14552	-0.5871	2.7957	3-10keV
1.14562	-0.7961	2.6457	3-10keV
1.14571	0.0281	2.6114	3-10keV
1.1458	1.2764	3.1584	3-10keV
1.14589	-1.8236	2.6829	3-10keV
1.14599	-1.1999	2.8124	3-10keV
1.14608	-0.8007	2.4748	3-10keV
1.14617	3.5424	3.2185	3-10keV
1.14626	0.6483	2.7465	3-10keV
1.14636	-1.2048	2.8175	3-10keV
1.14645	3.1258	2.9576	3-10keV
1.14654	1.2661	2.7241	3-10keV
1.14663	0.2441	3.3164	3-10keV
1.14673	-2.2393	2.3602	3-10keV
1.14682	0.0219	2.4396	3-10keV
1.14691	1.2697	3.0184	3-10keV
1.147	-1.4197	2.3271	3-10keV
1.1471	1.2748	3.1642	3-10keV
1.14719	3.3461	3.3581	3-10keV
1.14728	-1.1999	2.9658	3-10keV
1.14737	2.2956	2.5255	3-10keV
1.14747	1.4756	3.1509	3-10keV
1.14756	8.2961	3.6955	3-10keV
1.14765	0.0209	2.2621	3-10keV
1.14775	1.6879	3.1459	3-10keV
1.14784	-0.5904	2.6337	3-10keV
1.14793	3.9527	3.0716	3-10keV
1.14802	3.1354	3.2366	3-10keV
1.14812	-0.9996	2.653	3-10keV
1.14821	0.2367	2.7602	3-10keV
1.1483	2.5074	3.1142	3-10keV
1.14839	3.3331	3.2254	3-10keV
1.14849	1.2741	3.0239	3-10keV
1.14858	5.6304	3.7764	3-10keV
1.14867	0.4438	2.9061	3-10keV
1.14876	-0.1829	2.4471	3-10keV
1.14886	1.9053	3.0051	3-10keV
1.14895	-0.9937	3.1012	3-10keV
1.14904	7.4638	3.479	3-10keV
1.14913	2.7077	2.8211	3-10keV
1.14923	0.6532	2.8981	3-10keV
1.14932	-1.6249	2.5164	3-10keV
1.14941	1.0616	2.7369	3-10keV
1.1495	0.8492	2.8854	3-10keV
1.1496	4.3655	3.3197	3-10keV
1.14969	4.5725	3.3151	3-10keV
1.14978	-1.2096	2.4924	3-10keV
1.14987	3.9537	3.3329	3-10keV
1.14997	-0.7971	2.6444	3-10keV
1.15006	4.9832	3.4279	3-10keV
1.15015	-1.6171	2.6762	3-10keV
1.15025	0.6486	2.7454	3-10keV
1.15034	-3.0714	2.0108	3-10keV
1.15043	1.269	2.8765	3-10keV
1.15052	-2.2435	2.3633	3-10keV
1.15062	5.5933	3.281	3-10keV
1.15071	4.9888	2.8969	3-10keV
1.1508	-0.1804	2.6235	3-10keV
1.15089	0.443	2.5942	3-10keV
1.15099	2.7145	2.9717	3-10keV
1.15108	5.1917	3.2974	3-10keV
1.15117	-1.4111	2.6651	3-10keV
1.15126	2.7131	2.9744	3-10keV
1.15136	0.6555	3.0451	3-10keV
1.15145	2.7181	3.113	3-10keV
1.15154	0.6506	2.8954	3-10keV
1.15163	1.6869	3.143	3-10keV
1.15173	1.0688	3.0324	3-10keV
1.15182	4.3625	3.0567	3-10keV
1.15191	-3.0722	2.0136	3-10keV
1.152	-1.4184	2.5057	3-10keV
1.1521	0.8548	2.8914	3-10keV
1.15219	1.4808	3.1566	3-10keV
1.15228	0.6542	3.0456	3-10keV
1.15237	2.7154	2.9736	3-10keV
1.15247	-0.3806	2.7874	3-10keV
1.15256	-2.039	2.5311	3-10keV
1.15265	-4.3097	2.0727	3-10keV
1.15275	-0.1666	2.9296	3-10keV
1.15284	1.2681	3.0196	3-10keV
1.15293	2.5097	2.9799	3-10keV
1.15302	-1.8305	2.3428	3-10keV
1.15312	-0.1752	2.7771	3-10keV
1.15321	-1.418	2.5013	3-10keV
1.1533	3.338	3.0917	3-10keV
1.15339	4.7766	3.0419	3-10keV
1.15349	-0.9981	2.8057	3-10keV
1.15358	-1.0014	2.6521	3-10keV
1.15367	-0.5918	2.4691	3-10keV
1.15376	3.1197	2.8076	3-10keV
1.15386	2.9281	2.968	3-10keV
1.15395	-1.0057	2.6503	3-10keV
1.15404	1.0638	2.883	3-10keV
1.15413	-2.2361	2.6997	3-10keV
1.15423	0.2369	2.7612	3-10keV
1.15432	0.031	2.7678	3-10keV
1.15441	0.2369	2.761	3-10keV
1.1545	0.033	2.9207	3-10keV
1.1546	3.75	3.2137	3-10keV
1.15469	2.9317	3.2434	3-10keV
1.15478	-2.2498	2.1786	3-10keV
1.15487	4.7887	3.3153	3-10keV
1.15497	-4.7288	1.8817	3-10keV
1.15506	-1.6255	2.3353	3-10keV
1.15515	-4.1027	2.0658	3-10keV
1.15525	-0.3802	2.7921	3-10keV
1.15534	6.4518	3.3935	3-10keV
1.15543	2.0905	2.8445	3-10keV
1.15552	-3.0657	2.2089	3-10keV
1.15562	-1.0048	2.306	3-10keV
1.15571	-1.2129	2.3154	3-10keV
1.1558	-4.5262	1.8716	3-10keV
1.15589	-1.4096	2.5054	3-10keV
1.15599	1.8847	2.8525	3-10keV
1.15608	-3.0615	2.7314	3-10keV
1.15617	-0.7925	2.8019	3-10keV
1.15626	-1.6223	2.334	3-10keV
1.15636	2.7129	3.1071	3-10keV
1.15645	-0.3807	2.627	3-10keV
1.15654	0.0277	2.6111	3-10keV
1.15663	1.0708	2.8875	3-10keV
1.15673	0.0237	2.4463	3-10keV
1.15682	2.5098	3.1195	3-10keV
1.15691	-1.6208	2.6776	3-10keV
1.157	2.298	2.8393	3-10keV
1.1571	-0.5856	2.6397	3-10keV
1.15719	3.1316	2.9639	3-10keV
1.15728	0.238	2.9145	3-10keV
1.15737	-5.9335	2.8344	3-10keV
1.15747	-3.6798	2.5948	3-10keV
1.15756	1.47	2.7194	3-10keV
1.15765	5.1956	3.2992	3-10keV
1.15775	-1.6207	2.5139	3-10keV
1.15784	-2.2463	2.1756	3-10keV
1.15793	-1.827	2.5204	3-10keV
1.15802	-3.28	2.2246	3-10keV
1.15812	0.2343	2.605	3-10keV
1.15821	0.0236	2.4436	3-10keV
1.1583	1.2692	2.8761	3-10keV
1.15839	0.6471	2.5887	3-10keV
1.15849	0.02	2.2638	3-10keV
1.15858	0.8586	2.892	3-10keV
1.15867	1.6722	2.5442	3-10keV
1.15876	3.1174	2.9508	3-10keV
1.15886	3.1319	3.3612	3-10keV
1.15895	6.6399	3.5057	3-10keV
1.15904	2.096	2.9927	3-10keV
1.15913	4.1479	2.7694	3-10keV
1.15923	1.477	3.0107	3-10keV
1.15932	-0.7992	2.477	3-10keV
1.15941	-1.214	2.3196	3-10keV
1.1595	-0.3715	2.9325	3-10keV
1.1596	-2.4381	2.8595	3-10keV
1.15969	0.4502	3.0503	3-10keV
1.15978	-2.663	1.9916	3-10keV
1.15987	1.2713	2.879	3-10keV
1.15997	3.9477	3.0696	3-10keV
1.16006	-0.1737	2.9269	3-10keV
1.16015	4.9788	2.8925	3-10keV
1.16025	2.9261	3.2411	3-10keV
1.16034	-0.5903	2.6395	3-10keV
1.16043	3.3337	2.8067	3-10keV
1.16052	-3.0706	2.4001	3-10keV
1.16062	3.9549	3.2063	3-10keV
1.16071	3.1302	3.2312	3-10keV
1.1608	2.2971	2.8377	3-10keV
1.16089	-0.9988	2.8103	3-10keV
1.16099	1.2746	3.0279	3-10keV
1.16108	0.4491	2.7585	3-10keV
1.16117	3.3422	3.3584	3-10keV
1.16126	1.0621	2.8846	3-10keV
1.16136	4.3667	3.1931	3-10keV
1.16145	-0.1786	2.6223	3-10keV
1.16154	1.2662	2.7229	3-10keV
1.16163	0.0355	2.9197	3-10keV
1.16173	1.0721	3.1647	3-10keV
1.16182	4.9918	3.1765	3-10keV
1.16191	2.7153	2.9734	3-10keV
1.162	-0.3844	2.6269	3-10keV
1.1621	-5.349	2.1294	3-10keV
1.16219	-5.1461	2.1207	3-10keV
1.16228	-3.6866	2.427	3-10keV
1.16237	-0.998	2.8087	3-10keV
1.16247	-1.8275	2.5237	3-10keV
1.16256	-1.6194	2.5133	3-10keV
1.16265	1.4771	2.8718	3-10keV
1.16275	2.5185	3.257	3-10keV
1.16284	2.5114	2.9838	3-10keV
1.16293	3.3423	3.0967	3-10keV
1.16302	4.5806	3.1922	3-10keV
1.16312	0.4465	2.9111	3-10keV
1.16321	-0.9987	2.8104	3-10keV
1.1633	-1.2142	2.3177	3-10keV
1.16339	2.0991	3.1317	3-10keV
1.16349	0.6569	3.046	3-10keV
1.16358	0.4373	2.43	3-10keV
1.16367	2.5187	3.2574	3-10keV
1.16376	-2.6528	2.7222	3-10keV
1.16386	1.0586	2.7356	3-10keV
1.16395	5.2087	3.433	3-10keV
1.16404	3.9653	3.2117	3-10keV
1.16413	3.3363	2.954	3-10keV
1.16423	-0.3814	2.6309	3-10keV
1.16432	0.6442	2.5865	3-10keV
1.16441	-1.4217	2.3281	3-10keV
1.1645	5.6173	3.2939	3-10keV
1.1646	0.4539	2.9122	3-10keV
1.16469	0.0329	2.7726	3-10keV
1.16478	-1.6245	2.5147	3-10keV
1.16487	-2.4501	2.5507	3-10keV
1.16497	-1.2042	2.8203	3-10keV
1.16506	2.2986	2.9844	3-10keV
1.16515	-2.0395	2.1646	3-10keV
1.16525	2.101	3.1315	3-10keV
1.16534	4.1633	3.2018	3-10keV
1.16543	1.2701	2.879	3-10keV
1.16552	1.6839	2.8624	3-10keV
1.16562	6.2194	3.1331	3-10keV
1.16571	1.8996	3.1441	3-10keV
1.1658	-2.6581	2.3855	3-10keV
1.16589	1.8909	3.0027	3-10keV
1.16599	0.6484	2.7496	3-10keV
1.16608	2.5156	3.1238	3-10keV
1.16617	2.1164	3.6414	3-10keV
1.16626	3.7533	3.2191	3-10keV
1.16636	-5.1359	2.3109	3-10keV
1.16645	1.0656	2.8897	3-10keV
1.16654	0.0332	2.772	3-10keV
1.16663	-3.2652	2.7371	3-10keV
1.16673	0.648	2.7499	3-10keV
1.16682	1.2713	2.8808	3-10keV
1.16691	1.889	2.8576	3-10keV
1.167	-2.4459	2.7136	3-10keV
1.1671	-1.2057	2.8206	3-10keV
1.16719	2.5135	3.1218	3-10keV
1.16728	0.0321	2.7721	3-10keV
1.16737	0.2339	2.6051	3-10keV
1.16747	1.8881	2.857	3-10keV
1.16756	-4.7313	2.0995	3-10keV
1.16765	-0.5885	2.9431	3-10keV
1.16775	2.7157	2.8275	3-10keV
1.16784	-5.769	1.4306	3-10keV
1.16793	5.6106	3.2899	3-10keV
1.16802	-1.2125	2.4959	3-10keV
1.16812	-3.4893	2.2368	3-10keV
1.16821	-0.3811	2.938	3-10keV
1.1683	-3.0747	2.2157	3-10keV
1.16839	-3.0589	2.8848	3-10keV
1.16849	5.2114	3.6704	3-10keV
1.16858	4.9956	3.1802	3-10keV
1.16867	2.3003	2.6912	3-10keV
1.16876	0.0349	2.9268	3-10keV
1.16886	2.1009	3.0012	3-10keV
1.16895	2.3071	2.9918	3-10keV
1.16904	-3.2754	2.5819	3-10keV
1.16913	-2.6598	2.3802	3-10keV
1.16923	-1.2021	2.815	3-10keV
1.16932	-3.0633	2.5722	3-10keV
1.16941	-2.0288	2.8485	3-10keV
1.1695	-0.3706	3.0826	3-10keV
1.1696	0.6491	2.7525	3-10keV
1.16969	1.062	2.7355	3-10keV
1.16978	4.7897	3.3187	3-10keV
1.16987	5.4155	3.3007	3-10keV
1.16997	0.667	3.4391	3-10keV
1.17006	-1.4198	2.506	3-10keV
1.17015	-0.9994	2.8145	3-10keV
1.17025	-0.5873	2.7991	3-10keV
1.17034	-3.8973	2.4383	3-10keV
1.17043	3.5518	3.3547	3-10keV
1.17052	1.4826	3.1542	3-10keV
[truncated: 77,877 more rows]

## Sheet: figure1_radio
MJD-57190	15 GHz AMI-LA flux density (Jy)	Error 15 GHz flux density (Jy)	Band
0.025	0.052	0.0126	15GHz
0.075	0.0352	0.0062	15GHz
0.125	0.119	0.0122	15GHz
0.175	0.0522	0.0181	15GHz
0.225	0.043	0.0058	15GHz
0.275	0.0385	0.0055	15GHz
0.925	0.0938	0.0222	15GHz
0.975	0.0684	0.0117	15GHz
1.025	0.0707	0.0098	15GHz
1.125	0.0458	0.0059	15GHz
1.175	0.0372	0.0046	15GHz
1.225	0.0446	0.0044	15GHz
1.275	0.0562	0.0083	15GHz
1.325	0.0715	0.005	15GHz
1.925	0.0796	0.0064	15GHz
1.975	0.0899	0.0211	15GHz
2.025	0.0735	0.01	15GHz
2.075	0.0831	0.0122	15GHz
2.125	0.0608	0.0045	15GHz
2.175	0.2415	0.0965	15GHz
2.225	0.1972	0.0681	15GHz
2.275	0.1968	0.0744	15GHz
2.325	0.2527	0.0236	15GHz
2.925	0.1931	0.0455	15GHz
2.975	0.1353	0.0254	15GHz
3.025	0.1584	0.0678	15GHz
3.075	0.7799	0.2198	15GHz
3.125	0.3686	0.0859	15GHz
3.175	0.3041	0.0699	15GHz
3.225	0.2501	0.0272	15GHz
3.275	0.2126	0.0558	15GHz
3.325	0.1238	0.0094	15GHz
3.875	0.0815	0.0079	15GHz
3.925	0.062	0.0112	15GHz
3.975	0.2964	0.1504	15GHz
4.025	0.7734	0.0624	15GHz
4.075	0.6475	0.1437	15GHz
4.125	0.8492	0.1363	15GHz
4.175	0.7096	0.0389	15GHz
4.225	0.5972	0.0797	15GHz
4.275	0.4007	0.0276	15GHz
4.325	0.4228	0.01	15GHz
4.875	0.4393	0.0169	15GHz
4.925	0.5127	0.0431	15GHz
4.975	0.2716	0.0632	15GHz
5.025	0.3882	0.1247	15GHz
5.075	0.3767	0.0467	15GHz
5.125	0.3046	0.0945	15GHz
5.175	0.5813	0.0531	15GHz
5.225	0.4752	0.0649	15GHz
5.275	0.6993	0.2799	15GHz
5.325	1.0447	0.0449	15GHz
5.925	0.0909	0.0156	15GHz
5.975	0.1121	0.0089	15GHz
6.025	0.2497	0.064	15GHz
6.075	0.1815	0.0587	15GHz
6.125	0.0696	0.0093	15GHz
6.175	0.1025	0.0739	15GHz
6.225	0.2581	0.0137	15GHz
6.275	0.2542	0.0462	15GHz
6.925	0.1256	0.0192	15GHz
6.975	0.0764	0.0065	15GHz
7.025	0.0984	0.0157	15GHz
7.075	0.0961	0.0147	15GHz
7.125	0.183	0.0579	15GHz
7.175	0.3899	0.0691	15GHz
7.225	0.6658	0.0532	15GHz
7.275	0.5299	0.0754	15GHz
7.925	0.0553	0.0042	15GHz
7.975	0.047	0.0036	15GHz
8.025	0.039	0.0032	15GHz
8.075	0.0334	0.0028	15GHz
8.125	0.0313	0.0034	15GHz
8.175	0.0294	0.0035	15GHz
8.225	0.1241	0.0452	15GHz
8.275	0.3127	0.1181	15GHz
8.875	2.9995	0.166	15GHz
8.925	2.7119	0.2226	15GHz
8.975	2.6367	0.4049	15GHz
9.025	1.3607	0.265	15GHz
9.075	0.9085	0.0263	15GHz
9.125	0.7829	0.0655	15GHz
9.175	0.7792	0.1166	15GHz
9.225	0.5145	0.0263	15GHz
9.275	0.4805	0.0233	15GHz
9.925	0.157	0.074	15GHz
9.975	0.2209	0.0071	15GHz
10.025	0.2233	0.0109	15GHz
10.075	0.1855	0.0131	15GHz
10.125	0.1675	0.0241	15GHz
10.175	0.1578	0.0187	15GHz
10.225	0.1755	0.0064	15GHz
10.275	0.1484	0.0084	15GHz
10.925	0.0767	0.0067	15GHz
10.975	0.0655	0.0116	15GHz
11.025	0.056	0.0047	15GHz
11.075	0.0511	0.0053	15GHz
11.125	0.0387	0.0037	15GHz
11.175	0.0376	0.0043	15GHz
11.225	0.0354	0.005	15GHz
11.275	0.0366	0.0059	15GHz
11.925	0.03	0.0044	15GHz
11.975	0.036	0.0097	15GHz
12.025	0.0311	0.0058	15GHz
12.075	0.0295	0.0034	15GHz
12.125	0.0258	0.0034	15GHz
12.175	0.026	0.0041	15GHz
12.225	0.0276	0.0036	15GHz
12.275	0.0307	0.0052	15GHz
12.925	0.0334	0.0051	15GHz
