# Supplementary material for: A rapidly changing jet orientation in the stellar-mass black-hole system V404 Cygni
Source: Springer Nature journal article supplement (doi:10.1038/s41586-019-1152-0), 2019-04-29
Supplement: MOESM5 [file 41586_2019_1152_MOESM5_ESM.xlsx]

## Sheet: Paired components
Component pair	Beta	Error on Beta	Theta (degrees)	Lower error on theta (degrees)	Upper error on theta (degrees)
N2/S2	0.32	0.02	40.62	2.47	2.3
N3/S3	0.35	0.01	32.47	1.59	1.64
N6/S6	0.48	0.01	14.05	0.84	0.85

## Sheet: Individual components
Component	Proper motion (mas/day)	Error on proper motion (mas/day)
N1	23.02	0.14
N2 (tied)	20.05	0.12
S2 (tied)	12.18	0.29
N3 (tied)	19.43	0.12
S3 (tied)	10.54	0.1
N4	4.25	0.08
S5	46.23	0.17
N6 (tied)	16.05	0.19
S6 (tied)	5.79	0.08
S7	33.86	0.84
